# Supplementary material for: Molecular Characterization of Acquired Tolerance of Tumor Cells to Picropodophyllin (PPP)
Source: PubMed Central journal article supplement (PMC3056661; doi:10.1371/journal.pone.0014757), 2011-03-14
Supplement: pone.0014757.s003.pdf [file pone.0014757.s003.pdf]

**Table S1.** Results and primer details for qRT-PCR analyses of siRNA.

| Gene                       | Primer sequences 5'-3'    | Product size | Melting point | Effect of siRNA |
|----------------------------|---------------------------|--------------|---------------|-----------------|
| <b>Downregulated genes</b> |                           |              |               |                 |
| <i>ALDH1A3</i>             | F GCGAATAGCACCGACTATGG    | 136 bp       | 81 °C         | 37.8%           |
|                            | R ATGGAGCCTGTGCATAGAGG    |              |               |                 |
| <i>ANXA1</i>               | F GACCGATCTGAGGACTTTGG    | 129 bp       | 79 °C         | 21.1%           |
|                            | R GCTTCTTGGTGGTAACCATGG   |              |               |                 |
| <i>TLR4</i>                | F AATCCCCTGAGGCATTTAGG    | 100 bp       | 77 °C         | 63.6%           |
|                            | R CCCCATCTTCAATTGTCTGG    |              |               |                 |
| <i>SPIN3</i>               | F GATGGCTCCAAGAGAACTGG    | 142 bp       | 75 °C         | n/a             |
|                            | R TTGGCAAATTTCAAGATGACC   |              |               |                 |
| <i>SOCS3</i>               | F CTA CTGGAGCGCAGTGACC    | 112 bp       | n/a           | n/a             |
|                            | R GCTGAGCGTGAAGAAGTGG     |              |               |                 |
| <i>RAB5A</i>               | F ATTTCCAGGAAGCACAGTCC    | 144 bp       | 74 °C         | 29.4%           |
|                            | R TTGCTCCTGGATTTTGTGG     |              |               |                 |
| <b>Upregulated genes</b>   |                           |              |               |                 |
| <i>COX6A1</i>              | F ACGGAGAGCACGAGAGACC     | 122 bp       | 81.5 °C       | 4.3%            |
|                            | R TGGAAGTGGATTCACATGAGG   |              |               |                 |
| <i>LGALS2</i>              | F AAGATCACAGGCAGCATCG     | 117 bp       | 81 °C         | n/a             |
|                            | R GCAGACAATGGTGGATTCCG    |              |               |                 |
| <i>NFIX</i>                | F GAGAGCCCTGTTGATGACG     | 140 bp       | 79 °C         | 9.0%            |
|                            | R CTGCAGAAGTCCAGCTTTCC    |              |               |                 |
| <i>ME1</i>                 | F CTATGTGTTCCCTGGAGTTGC   | 137 bp       | 86 °C         | 2.0%            |
|                            | R GATAAAGCCGACCCTCTTCC    |              |               |                 |
| <i>BCL2</i>                | F GCCTTATGCATTTGTTTTGG    | 145 bp       | 74 °C         | n/a             |
|                            | R TTCGGATCTTTATTTTCATGAGG |              |               |                 |
| <i>MAPK</i>                | F CACCAACCTCTCGTACATCG    | 133 bp       | 81 °C         | 56.5%           |
|                            | R CAGGGTTCTCTGGCAGTAGG    |              |               |                 |
| <i>TAP2</i>                | F CGCCTTCTTCTTCCTTGTC     | 101 bp       | 78 °C         | 47.2%           |
|                            | R CATGGGGGTCAAATCACC      |              |               |                 |
| <b>Reference gene</b>      |                           |              |               |                 |
| <i>GAPDH</i>               | F GGGAAGCTTGTCATCAATGG    | 126 bp       | 82 °C         | n/a             |
|                            | R CTCCATGGTGGTGAAGACG     |              |               |                 |

F = Forward; R = Reverse; n/a = not available or not applicable
