# Supplementary material for: Molecular Characterization of Acquired Tolerance of Tumor Cells to Picropodophyllin (PPP)
Source: PubMed Central journal article supplement (PMC3056661; doi:10.1371/journal.pone.0014757), 2011-03-14
Supplement: pone.0014757.s004.pdf [file pone.0014757.s004.pdf]

**Table S2. Copy number abnormalities by array-CGH in parental and PPP tolerant Line2 and Line3 cell lines.**

|                             | Losses                                                                               |                                                        | Gains                                                                     |                                         |
|-----------------------------|--------------------------------------------------------------------------------------|--------------------------------------------------------|---------------------------------------------------------------------------|-----------------------------------------|
|                             | Parental                                                                             | PPP tolerant                                           | Parental                                                                  | PPP tolerant                            |
| <b>Line2 and Line2-T500</b> |                                                                                      |                                                        |                                                                           |                                         |
| Chr 1                       | 1p21.1-p22.1                                                                         | 1p21.1-p22.1                                           | 1p32.3-p35.1; p13.3-q21.1                                                 | 1p32.3-p35.2; p11.2-p13.3               |
| Chr 2                       | -                                                                                    | -                                                      | 2p11.2-pter; q14.3                                                        | 2p12-pter                               |
| Chr 3                       | 3q23-q26.31                                                                          | -                                                      | 3p11.1-p14.1/ <b>p12.2-p12.3, p13-p14.1;</b><br>q21.2-q22.3/ <b>q22.3</b> | 3p11.1-p14.2; q21.2-q22.3               |
| Chr 4                       | 4p11-q15.32; q13.2-qter                                                              | 4p11-p15.32; q13.1-q31.3                               | 4q12                                                                      | -                                       |
| Chr 5                       | 5q12.1                                                                               | 5p14.3-pter                                            | -                                                                         | -                                       |
| Chr 6                       | -                                                                                    | 6p21.31-qter                                           | 6p24.3-pter                                                               | 6p24.3-pter                             |
| Chr 7                       | -                                                                                    | -                                                      | 7pter-q11.21; q11.22-q31.1;<br>q31.33-qter/ <b>q32.1-q36.1</b>            | 7q32.1-q34; q35-qter/ <b>q33</b>        |
| Chr 8                       | -                                                                                    | -                                                      | <b>8q21.2</b> ; q24.13-qter                                               | <b>8q21.2</b> ; q24.13-qter             |
| Chr 9                       | 9p13.2; p21.1-pter / <b>p21.1-p21.3 hz</b>                                           | 9p13.2; p21.1-pter / <b>p21.1-p21.3 hz</b> ; p11.3-q12 | 9q34.11-qter                                                              | -                                       |
| Chr 10                      | 10p12.32-q21.3; q22.1-q22.2; q23.2-<br>-q23.33/ <b>q23.33-q24.1 hz</b> ; q24.33-qter | 10q23.33-q24.2/ <b>q23.33-24.2 hz</b> ; q24.32-q26.3   | -                                                                         | 10p12.32-pter; q22.2-q23.2              |
| Chr 11                      | 11q22.1-qter                                                                         | 11q22.1-qter                                           | 11p15.5-pter                                                              | -                                       |
| Chr 12                      | 12p12.3-p13.31                                                                       | <b>12p12.3-p13.2 hz</b> ; p13.31-pter                  | 12p11.1-p12.1; q23.3-qter                                                 | 12p11.1-p12.3; q23.3-q24.31             |
| Chr 13                      | 13q31.1                                                                              | -                                                      | -                                                                         | 13q31.3-qter                            |
| Chr 14                      | -                                                                                    | -                                                      | -                                                                         | -                                       |
| Chr 15                      | -                                                                                    | -                                                      | -                                                                         | -                                       |
| Chr 16                      | 16q22.3-q24.1                                                                        | 16q22.3-q23.1; q23.1-qter                              | 16p11.2-q21; q22.1-q22.3                                                  | 16p11.2-q22.3                           |
| Chr 17                      | -                                                                                    | -                                                      | 17q22-q23.2                                                               | 17q22-q23.2                             |
| Chr 18                      | 18q12.3-q21.2; q21.31-q22.3                                                          | 18q12.3-q21.2; q21.31-q22.3                            | 18p11.21-pter; q11.1-q11.2                                                | 18q11.1-q11.2; q21.2-q21.31; q22.3-qter |
| Chr 19                      | 19p13.2; q13.42-qter                                                                 | 19p13.2; q13.42-qter                                   | -                                                                         | -                                       |
| Chr 20                      | <b>20p12.1 hz</b>                                                                    | <b>20p12.1 hz</b>                                      | 20q11.1-q13.2; q13.31-qter                                                | 20q11.1-qter                            |
| Chr 21                      | -                                                                                    | 21q11.2-q22.3                                          | 21q22.3-qter                                                              | -                                       |
| Chr 22                      | -                                                                                    | -                                                      | 22q11.1-q12.3; q12.3-q13.2                                                | -                                       |
| <b>Line3 and Line3-T200</b> |                                                                                      |                                                        |                                                                           |                                         |
| Chr 1                       | -                                                                                    | -                                                      | 1q41-q43                                                                  | 1q21.1-q25.3; q32.1-q32.3; q41-qter     |
| Chr 2                       | 2p25.1; p13.1                                                                        | 2p25.1; p13.1                                          | -                                                                         | -                                       |
| Chr 3                       | 3p14.2                                                                               | 3p12.3-p13                                             | -                                                                         | 3q27.3-qter                             |
| Chr 4                       | 4q22.1; q22.3-q31.21                                                                 | 4q22.1                                                 | -                                                                         | 4p15.2-pter                             |
| Chr 5                       | -                                                                                    | -                                                      | -                                                                         | 5p15.1-pter; p13.3-q11.2/ <b>q11.2</b>  |

|        |                             |                                |                                                     |                                         |
|--------|-----------------------------|--------------------------------|-----------------------------------------------------|-----------------------------------------|
| Chr 6  | 6q26-qter                   | 6q26-qter                      | -                                                   | -                                       |
| Chr 7  | 7q31.1                      | 7q31.1; q35                    | 7p11.22-p13-/ <b>p12.3-p13; q21.13</b> ; q32.3-qter | <b>7p12.3-p13</b> ; q21.13              |
| Chr 8  | -                           | -                              | <b>8q24.21</b>                                      | <b>8q24.21</b> ; q24.22; q24.3          |
| Chr 9  | -                           | -                              | 9q34.3                                              | -                                       |
| Chr 10 | -                           | -                              | 10q11.2-q23.31                                      | 10q11.2-q11.23; q22.1-q23.31            |
| Chr 11 | -                           | 11q21-q22.1; q22.1-qter        | -                                                   | 11p11.12-p12; q12.1-q21                 |
| Chr 12 | -                           | -                              | 12p11.1-pter/ <b>p11.23-p12.1</b> ; q12-q13.3       | 12p11.1-p12.1/ <b>p12.1</b> ; q12-q13.3 |
| Chr 13 | 13q11.1-q14.2               | 13q11.1-q11.2                  | 13q21.31-q31.1; q31.3-qter                          | 13q21.31-qter                           |
| Chr 14 | -                           | -                              | 14q11.2                                             | -                                       |
| Chr 15 | -                           | -                              | 15q25.3                                             | -                                       |
| Chr 16 | <b>16p13.2 hz</b> ; q23.3   | <b>16p13.2 hz</b> ; q23.3-qter | 16p11.1-q23.3/ <b>q14-q23.3</b>                     | 16q11.2-q14; <b>q14-q23.3</b>           |
| Chr 17 | -                           | 17q23.2                        | 17p13.1-pter; q23.2-q25.3                           | 17q11.2; q12                            |
| Chr 18 | 18q11.2-qter/ <b>q14 hz</b> | 18q11.2-qter                   | -                                                   | 18q12.1                                 |
| Chr 19 | -                           | -                              | -                                                   | -                                       |
| Chr 20 | 20p12.1                     | 20p12.1                        | 20p12.1-pter; q11.23-qter                           | 20p12.1-pter; q11.23-qter               |
| Chr 21 | -                           | -                              | 21q22.11                                            | -                                       |
| Chr 22 | 22q12.2                     | 22q12.2                        | -                                                   | 22q12.3; q13.32-q13.33                  |

Homozygous loss (hz) is indicated in italic and bold; Amplifications are marked in bold
