# Supplementary material for: Molecular Characterization of Acquired Tolerance of Tumor Cells to Picropodophyllin (PPP)
Source: PubMed Central journal article supplement (PMC3056661; doi:10.1371/journal.pone.0014757), 2011-03-14
Supplement: pone.0014757.s006.pdf [file pone.0014757.s006.pdf]

**Table S4. Gene list U, commonly up-regulated or down-regulated genes in Line2-T500 and Line3-T200 cells (>2-fold difference between parental and PPP tolerant cells).**

| Affymetrix<br>Probe Set ID | Gene<br>Symbol | Gene Title                                              | Chromosome<br>location | Fold change in PPP tolerant cells |            |        |
|----------------------------|----------------|---------------------------------------------------------|------------------------|-----------------------------------|------------|--------|
|                            |                |                                                         |                        | Line2-T500                        | Line3-T200 | Both   |
| <b>Upregulated genes</b>   |                |                                                         |                        |                                   |            |        |
| 224344_at                  | COX6A1*        | cytochrome c oxidase subunit VIa polypeptide 1          | 12q24.2                | 156.3                             | 8440.9     | 1148.5 |
| 216405_at                  | ---/*          | HL14 gene encoding beta-galactoside-binding lectin      | 22q13.1                | 163.5                             | 2545.5     | 645.2  |
| 231628_s_at                | ---            | ---                                                     | ---                    | 252.7                             | 577.6      | 382.0  |
| 217676_at                  | ---            | Transcribed locus, moderately similar to XP_998898.1    | ---                    | 47.2                              | 316.5      | 122.3  |
| 231655_x_at                | ---            | ---                                                     | ---                    | 22.7                              | 220.8      | 70.8   |
| 1556824_at                 | ---            | Full length insert cDNA clone ZM10C10                   | ---                    | 13.1                              | 334.1      | 66.0   |
| 241575_at                  | ---            | ---                                                     | ---                    | 43.3                              | 92.5       | 63.3   |
| 209807_s_at                | NFIX *         | nuclear factor I/X (CCAAT-binding transcription factor) | 19p13.3                | 35.4                              | 55.8       | 44.5   |
| 211204_at                  | ME1*           | malic enzyme 1, NADP(+)-dependent, cytosolic            | 6q12                   | 8.4                               | 207.2      | 41.7   |
| 1570107_at                 | ---            | ---                                                     | ---                    | 18.9                              | 63.8       | 34.7   |
| 1565875_at                 | ---            | Full length insert cDNA clone YP86C01                   | 6p22.3                 | 20.3                              | 56.1       | 33.7   |
| 227282_at                  | PCDH19         | protocadherin 19                                        | Xq13.3                 | 54.2                              | 17.5       | 30.8   |
| 209357_at                  | CITED2         | Cbp/p300-interacting transactivator                     | 6q23.3                 | 8.0                               | 89.4       | 26.7   |
| 1563833_at                 | ---            | ---                                                     | ---                    | 14.1                              | 49.2       | 26.3   |
| 234802_at                  | ---            | ---                                                     | ---                    | 5.9                               | 100.9      | 24.3   |
| 211161_s_at                | COL3A1         | collagen, type III, alpha 1                             | 2q31                   | 10.3                              | 53.4       | 23.4   |
| 231594_at                  | ---            | ---                                                     | ---                    | 7.8                               | 68.7       | 23.1   |
| 217114_at                  | LOC652147      | similar to U5 snRNP-specific protein, 200 kDa           | ---                    | 5.2                               | 82.7       | 20.7   |
| 216500_at                  | ---            | HL14 gene encoding beta-galactoside-binding lectin      | ---                    | 12.0                              | 34.3       | 20.3   |
| 241781_at                  | C9orf41        | chromosome 9 open reading frame 41                      | 9q21.13                | 11.8                              | 32.3       | 19.6   |
| 225524_at                  | ANTXR2         | anthrax toxin receptor 2                                | 4q21.21                | 11.2                              | 31.6       | 18.8   |
| 215505_s_at                | STRN3          | striatin, calmodulin binding protein 3                  | 14q13-21               | 5.6                               | 60.3       | 18.5   |
| 1554201_at                 | CABP4          | calcium binding protein 4                               | 11q13.1                | 5.4                               | 47.0       | 15.9   |
| 1570382_at                 | ---            | ---                                                     | ---                    | 7.7                               | 28.9       | 15.0   |
| 204135_at                  | FILIP1L        | filamin A interacting protein 1-like                    | 3q12.1                 | 9.7                               | 19.7       | 13.8   |
| 201668_x_at                | MARCKS         | myristoylated alanine-rich protein kinase C substrate   | 6q22.2                 | 27.4                              | 7.0        | 13.8   |
| 241771_at                  | RIMBP2         | RIMS binding protein 2                                  | ---                    | 10.9                              | 15.1       | 12.8   |
| 231040_at                  | ---            | CDNA FLJ43172 fis, clone FCBBF3007242                   | 9q22                   | 2.2                               | 68.1       | 12.3   |
| 1554506_x_at               | NAALAD2        | N-acetylated alpha-linked acidic dipeptidase 2          | 11q14.3-21             | 43.1                              | 3.4        | 12.1   |
| 1554302_s_at               | LOC645591      | hypothetical protein LOC645591                          | 7q22.1                 | 4.8                               | 30.0       | 12.0   |
| 1561340_at                 | ---            | CDNA clone IMAGE:4838684                                | ---                    | 18.3                              | 7.8        | 11.9   |
| 1553153_at                 | ATP6V0D2       | ATPase, H+ transporting, lysosomal 38kDa, V0 subunit d2 | ---                    | 4.8                               | 28.5       | 11.7   |
| 209283_at                  | CRYAB          | crystallin, alpha B                                     | 11q22.3-23.1           | 2.8                               | 40.8       | 10.7   |
| 207882_at                  | HSAJ2425       | p65 protein                                             | ---                    | 3.1                               | 36.1       | 10.6   |
| 203603_s_at                | ZEB2           | zinc finger E-box binding homeobox 2                    | 2q22                   | 3.9                               | 26.5       | 10.2   |
| 1553155_x_at               | ATP6V0D2       | ATPase, H+ transporting, lysosomal 38kDa, V0 subunit d2 | ---                    | 8.1                               | 11.8       | 9.7    |
| 214505_s_at                | FHL1           | four and a half LIM domains 1                           | Xq26                   | 8.7                               | 10.5       | 9.6    |
| 221047_s_at                | MARK1          | MAP/microtubule affinity-regulating kinase 1            | 1q41                   | 16.7                              | 5.2        | 9.3    |
| 1554966_a_at               | FILIP1L        | filamin A interacting protein 1-like                    | 3q12.1                 | 11.8                              | 7.0        | 9.1    |
| 231945_at                  | FILIP1         | filamin A interacting protein 1                         | 6q14.1                 | 4.9                               | 16.5       | 9.0    |
| 228982_s_at                | USP42          | Ubiquitin specific peptidase 42                         | 7p22.1                 | 3.3                               | 24.3       | 8.9    |
| 234790_at                  | ---            | CDNA: FLJ21261 fis, clone COL01461                      | 1p32.1                 | 5.3                               | 15.0       | 8.9    |
| 224049_at                  | KCNK17         | potassium channel, subfamily K, member 17               | 6p21.1                 | 7.1                               | 9.9        | 8.4    |
| 232523_at                  | MEGF10         | multiple EGF-like-domains 10                            | 5q33                   | 2.1                               | 31.7       | 8.2    |
| 228333_at                  | ---            | Full length insert cDNA clone YT94E02                   | ---                    | 2.8                               | 22.5       | 8.0    |
| 217139_at                  | VDAC1          | voltage-dependent anion channel 1                       | 5q31                   | 5.4                               | 11.8       | 8.0    |
| 210220_at                  | FZD2           | frizzled homolog 2 (Drosophila)                         | 17q21.1                | 2.8                               | 21.5       | 7.8    |
| 227400_at                  | NFIX           | nuclear factor I/X (CCAAT-binding transcription factor) | 19p13.3                | 2.0                               | 27.0       | 7.4    |
| 214492_at                  | SGCD           | sarcoglycan, delta                                      | 5q33-34                | 2.5                               | 19.8       | 7.0    |
| 1563318_s_at               | MAGIX          | MAGI family member, X-linked                            | Xp11.23                | 2.4                               | 20.3       | 7.0    |
| 207755_at                  | ---            | ---                                                     | ---                    | 2.1                               | 22.3       | 6.8    |
| 201669_s_at                | MARCKS         | myristoylated alanine-rich protein kinase C substrate   | 6q22.2                 | 8.2                               | 5.7        | 6.8    |
| 209560_s_at                | DLK1           | delta-like 1 homolog (Drosophila)                       | 14q32                  | 9.5                               | 4.6        | 6.6    |
| 209738_x_at                | PSG6           | pregnancy specific beta-1-glycoprotein 6                | 19q13.2                | 3.8                               | 11.2       | 6.5    |
| 228573_at                  | ---            | Full-length cDNA clone CS0DD001YA12 of Neuroblastoma    | ---                    | 2.6                               | 16.1       | 6.5    |
| 240411_at                  | FLJ40243       | hypothetical protein FLJ40243                           | 5p13.1                 | 6.5                               | 6.3        | 6.4    |
| 219993_at                  | SOX17          | SRY (sex determining region Y)-box 17                   | 8q11.23                | 2.2                               | 18.4       | 6.3    |
| 212514_x_at                | DDX3X          | DEAD (Asp-Glu-Ala-Asp) box polypeptide 3, X-linked      | Xp11.3-11.23           | 2.3                               | 15.4       | 6.0    |
| 209926_at                  | MEF2B          | myocyte enhancer factor 2B                              | 19p12                  | 8.8                               | 4.0        | 6.0    |
| 219778_at                  | ZFPM2          | zinc finger protein, multitype 2                        | 8q23                   | 4.6                               | 7.6        | 5.9    |
| 226679_at                  | SLC26A11       | solute carrier family 26, member 11                     | 17q25.3                | 2.2                               | 15.7       | 5.9    |
| 239572_at                  | GJA3           | gap junction protein, alpha 3, 46kDa                    | ---                    | 7.7                               | 4.5        | 5.9    |
| 212956_at                  | TBC1D9         | TBC1 domain family, member 9                            | 4q31.21                | 2.6                               | 13.1       | 5.8    |
| 202403_s_at                | COL1A2         | collagen, type I, alpha 2                               | 7q22.1                 | 3.8                               | 8.7        | 5.8    |
| 234351_x_at                | TRPS1          | trichorhinophalangeal syndrome I                        | 8q24.12                | 2.8                               | 11.5       | 5.7    |
| 212503_s_at                | DIP2C          | DIP2 disco-interacting protein 2 homolog C (Drosophila) | 10p15.3                | 2.1                               | 14.4       | 5.5    |

|              |                     |                                                                                                         |                              |      |      |     |
|--------------|---------------------|---------------------------------------------------------------------------------------------------------|------------------------------|------|------|-----|
| 217673_x_at  | GNAS                | GNAS complex locus                                                                                      | 20q13.3                      | 2.2  | 13.8 | 5.5 |
| 232416_at    | BRUNOL5             | bruno-like 5, RNA binding protein (Drosophila)                                                          | 19p13                        | 8.2  | 3.6  | 5.4 |
| 207777_s_at  | SP140               | SP140 nuclear body protein                                                                              | 2q37.1                       | 4.5  | 6.5  | 5.4 |
| 206864_s_at  | HRK                 | harakiri, BCL2 interacting protein                                                                      | 12q24.22                     | 2.1  | 13.8 | 5.4 |
| 224064_s_at  | DHDDS               | dehydrodolichyl diphosphate synthase                                                                    | 1p36.11 /Xq28                | 6.7  | 4.3  | 5.4 |
| 1558706_a_at | ATOX1               | atonal homolog 8 (Drosophila)                                                                           | 2p11.2                       | 6.5  | 4.4  | 5.3 |
| 231229_at    | HILS1               | histone linker H1 domain, spermatid-specific 1                                                          | 17q21.33                     | 3.8  | 7.2  | 5.2 |
| 225897_at    | MARCKS              | myristoylated alanine-rich protein kinase C substrate                                                   | ---                          | 8.6  | 3.2  | 5.2 |
| 1556829_at   | TIPARP              | TCDD-inducible poly(ADP-ribose) polymerase                                                              | 3q25.31                      | 5.5  | 5.0  | 5.2 |
| 223642_at    | ZIC2                | Zic family member 2                                                                                     | 13q32                        | 2.8  | 9.8  | 5.2 |
| 239673_at    | ---                 | Transcribed locus                                                                                       | 4q31.1                       | 3.4  | 8.0  | 5.2 |
| 228141_at    | LOC493869           | Similar to RIKEN cDNA 2310016C16                                                                        | 5q11.2                       | 6.4  | 3.9  | 5.0 |
| 220245_at    | SLC45A2             | solute carrier family 45, member 2                                                                      | 5p13.3                       | 5.0  | 4.9  | 5.0 |
| 224340_at    | ---                 | ---                                                                                                     | ---                          | 5.3  | 4.7  | 5.0 |
| 1558999_x_at | PDPR                | pyruvate dehydrogenase phosphatase regulatory subunit                                                   | 16q22.1 /q22.3               | 11.2 | 2.1  | 4.9 |
| 204506_at    | PPP3R1              | protein phosphatase 3, regulatory subunit B, alpha isoform                                              | 2p15                         | 2.6  | 9.1  | 4.8 |
| 227711_at    | GTSF1               | gametocyte specific factor 1                                                                            | 12q13.2                      | 4.1  | 5.6  | 4.8 |
| 1554371_at   | PKD1L2              | polycystic kidney disease 1-like 2                                                                      | 16q23.2                      | 4.0  | 5.9  | 4.8 |
| 221760_at    | MAN1A1              | Mannosidase, alpha, class 1A, member 1                                                                  | 6q22                         | 4.2  | 5.5  | 4.8 |
| 204069_at    | MEIS1               | Meis homeobox 1                                                                                         | 2p14-p13                     | 2.6  | 8.9  | 4.8 |
| 208523_x_at  | HIST1H2BI           | histone cluster 1, H2bi                                                                                 | 6p21.3                       | 4.0  | 5.8  | 4.8 |
| 205481_at    | ADORA1              | adenosine A1 receptor                                                                                   | 1q32.1                       | 7.1  | 3.2  | 4.8 |
| 235101_at    | FNBP4               | formin binding protein 4                                                                                | 11p11.2                      | 6.6  | 3.4  | 4.7 |
| 238946_at    | ---                 | Transcribed locus                                                                                       | 11q21                        | 4.3  | 5.1  | 4.7 |
| 227108_at    | STARD9              | StAR-related lipid transfer (START) domain containing 9                                                 | 15q15.2                      | 4.4  | 5.0  | 4.7 |
| 227812_at    | TNFRSF19            | tumor necrosis factor receptor superfamily, member 19                                                   | 13q12.11-12.3                | 2.1  | 10.4 | 4.6 |
| 242861_at    | ---                 | ---                                                                                                     | ---                          | 3.7  | 5.9  | 4.6 |
| 204469_at    | PTPRZ1              | protein tyrosine phosphatase, receptor-type, Z polypeptide 1                                            | 7q31.3                       | 3.0  | 7.1  | 4.6 |
| 1568830_at   | IRAK3               | Interleukin-1 receptor-associated kinase 3                                                              | 2q24.2                       | 4.9  | 4.2  | 4.6 |
| 242828_at    | ---                 | ---                                                                                                     | 2q24.3                       | 2.7  | 7.7  | 4.6 |
| 209423_s_at  | PHF20               | PHD finger protein 20                                                                                   | 20q11.22-11.23               | 2.7  | 7.6  | 4.5 |
| 220122_at    | MCTP1               | multiple C2 domains, transmembrane 1                                                                    | 5q15                         | 4.0  | 5.2  | 4.5 |
| 221530_s_at  | BHLHB3              | basic helix-loop-helix domain containing, class B, 3                                                    | 12p11.23-12.1                | 3.6  | 5.7  | 4.5 |
| 1562730_a_at | ---                 | CDNA clone IMAGE:4110098                                                                                | 17q21                        | 2.3  | 8.8  | 4.5 |
| 211711_s_at  | PTEN                | phosphatase and tensin homolog                                                                          | 10q23.3                      | 3.9  | 5.2  | 4.5 |
| 209951_s_at  | MAP2K7              | mitogen-activated protein kinase kinase 7                                                               | 19p13.3-13.2                 | 2.7  | 7.5  | 4.5 |
| 1569250_at   | ZNF333              | zinc finger protein 333                                                                                 | 19p13                        | 7.2  | 2.7  | 4.4 |
| 212242_at    | TUBA4A              | tubulin, alpha 4a                                                                                       | 2q35                         | 6.5  | 3.0  | 4.4 |
| 217107_at    | LOC442257           | similar to 40S ribosomal protein S4, Y isoform 2                                                        | ---                          | 4.2  | 4.5  | 4.4 |
| 219574_at    | MARCH1              | membrane-associated ring finger (C3HC4) 1                                                               | 4q32.3                       | 2.7  | 7.0  | 4.3 |
| 211931_s_at  | HNRPA3/<br>HNRPA3P1 | heterogeneous nuclear ribonucleoprotein A3 pseudogene 1 /<br>heterogeneous nuclear ribonucleoprotein A3 | 10q11.21 /<br>2q31.2 /Xq27.1 | 2.7  | 7.0  | 4.3 |
| 201670_s_at  | MARCKS              | myristoylated alanine-rich protein kinase C substrate                                                   | 6q22.2                       | 6.0  | 3.1  | 4.3 |
| 233845_at    | ---                 | Clone HQ0452 PRO0452                                                                                    | ---                          | 3.6  | 5.0  | 4.3 |
| 201732_s_at  | CLCN3               | chloride channel 3                                                                                      | 4q33                         | 2.3  | 8.0  | 4.2 |
| 204201_s_at  | PTPN13              | protein tyrosine phosphatase, non-receptor type 13                                                      | 4q21.3                       | 2.3  | 7.7  | 4.2 |
| 232096_x_at  | ---                 | CDNA: FLJ22140 fis, clone HEP20977                                                                      | 3p14.1                       | 4.4  | 4.0  | 4.2 |
| 231969_at    | STOX2               | storkhead box 2                                                                                         | 4q35.1                       | 3.2  | 5.4  | 4.2 |
| 241955_at    | HECTD1              | HECT domain containing 1                                                                                | 14q12                        | 2.6  | 6.5  | 4.1 |
| 212805_at    | PRUNE2              | prune homolog 2 (Drosophila)                                                                            | 9q21.13                      | 2.5  | 6.7  | 4.1 |
| 224203_at    | SUFU                | suppressor of fused homolog (Drosophila)                                                                | 10q24.32                     | 2.7  | 6.2  | 4.1 |
| 204271_s_at  | EDNRB               | endothelin receptor type B                                                                              | 13q22                        | 3.8  | 4.4  | 4.1 |
| 238145_at    | ---                 | Transcribed locus                                                                                       | 1q44                         | 2.2  | 7.4  | 4.1 |
| 206306_at    | RYR3                | ryanodine receptor 3                                                                                    | 15q14-15                     | 2.7  | 6.1  | 4.1 |
| 230556_at    | IMMP1L              | IMP1 inner mitochondrial membrane peptidase-like (S. cer)                                               | 11p13                        | 2.9  | 5.5  | 4.0 |
| 225363_at    | PTEN                | phosphatase and tensin homolog                                                                          | 10q23.3                      | 4.3  | 3.6  | 4.0 |
| 233614_at    | ---                 | CDNA FLJ11661 fis, clone HEMBA1004617                                                                   | 3q13.11                      | 3.9  | 4.0  | 4.0 |
| 205809_s_at  | WASL                | Wiskott-Aldrich syndrome-like                                                                           | 7q31.3                       | 2.2  | 7.0  | 3.9 |
| 204770_at    | TAP2                | transporter 2, ATP-binding cassette, sub-family B (MDR/TAP)                                             | 6p21.3                       | 3.1  | 4.9  | 3.9 |
| 214561_at    | LILRP2              | leukocyte immunoglobulin-like receptor pseudogene 2                                                     | 19q13.4                      | 2.2  | 6.8  | 3.9 |
| 215800_at    | DUOX1               | dual oxidase 1                                                                                          | 5q15.3                       | 2.1  | 6.9  | 3.8 |
| 1555786_s_at | ---                 | ---                                                                                                     | ---                          | 5.4  | 2.7  | 3.8 |
| 1555021_a_at | SCARF1              | scavenger receptor class F, member 1                                                                    | 17p13.3                      | 3.2  | 4.5  | 3.8 |
| 1553845_x_at | C10orf67            | chromosome 10 open reading frame 67                                                                     | 10p12.2                      | 2.6  | 5.4  | 3.8 |
| 242486_at    | ---                 | Transcribed locus                                                                                       | 15q22.31                     | 5.8  | 2.4  | 3.8 |
| 201101_s_at  | BCLAF1              | BCL2-associated transcription factor 1                                                                  | 6q22-23                      | 2.9  | 4.8  | 3.7 |
| 1569958_at   | ---                 | Homo sapiens, clone IMAGE:4064953, mRNA                                                                 | ---                          | 4.3  | 3.2  | 3.7 |
| 211712_s_at  | ANXA9               | annexin A9                                                                                              | 1q21                         | 6.2  | 2.2  | 3.7 |
| 230117_at    | VSTM2A              | V-set and transmembrane domain containing 2A                                                            | 7p11.2                       | 3.4  | 4.0  | 3.7 |
| 224566_at    | TncRNA              | trophoblast-derived noncoding RNA                                                                       | 11q13.1                      | 4.6  | 3.0  | 3.7 |
| 203221_at    | TLE1                | transducin-like enhancer of split 1                                                                     | 9q21.32                      | 2.3  | 5.8  | 3.7 |
| 228715_at    | ZCCHC12             | zinc finger, CCHC domain containing 12                                                                  | Xq24                         | 2.8  | 4.7  | 3.6 |
| 213002_at    | MARCKS              | myristoylated alanine-rich protein kinase C substrate                                                   | 6q22.2                       | 3.9  | 3.3  | 3.6 |
| 204451_at    | FZD1                | frizzled homolog 1                                                                                      | 7q21                         | 2.0  | 6.3  | 3.6 |

|              |                                  |                                                                                                                                              |                |     |     |     |
|--------------|----------------------------------|----------------------------------------------------------------------------------------------------------------------------------------------|----------------|-----|-----|-----|
| 223729_at    | <i>CECR2</i>                     | cat eye syndrome chromosome region, candidate 2                                                                                              | 22q11.2        | 2.6 | 4.9 | 3.5 |
| 230259_at    | <i>C10orf125</i>                 | chromosome 10 open reading frame 125                                                                                                         | 10q26.3        | 2.1 | 6.0 | 3.5 |
| 204518_s_at  | <i>PPIC</i>                      | peptidylprolyl isomerase C                                                                                                                   | 5q23.2         | 2.7 | 4.7 | 3.5 |
| 242134_at    | ---                              | Transcribed locus                                                                                                                            | ---            | 3.4 | 3.7 | 3.5 |
| 209947_at    | <i>UBAP2L</i>                    | ubiquitin associated protein 2-like                                                                                                          | 1q21.3         | 2.2 | 5.7 | 3.5 |
| 203167_at    | <i>TIMP2</i>                     | TIMP metalloproteinase inhibitor 2                                                                                                           | 17q25          | 2.1 | 5.8 | 3.5 |
| 216556_x_at  | ---                              | ---                                                                                                                                          | ---            | 2.1 | 5.7 | 3.5 |
| 208358_s_at  | <i>UGT8</i>                      | UDP glycosyltransferase 8                                                                                                                    | 4q26           | 2.2 | 5.4 | 3.5 |
| 1561135_at   | ---                              | Full length insert cDNA clone YT88G03                                                                                                        | 2q21.2         | 2.8 | 4.1 | 3.4 |
| 1554417_s_at | <i>APH1A</i>                     | anterior pharynx defective 1 homolog A (C. elegans)                                                                                          | 1p36.13-q31.3  | 2.1 | 5.5 | 3.4 |
| 224565_at    | <i>TncRNA</i>                    | trophoblast-derived noncoding RNA                                                                                                            | 11q13.1        | 3.1 | 3.8 | 3.4 |
| 1555908_at   | <i>FAM120A</i>                   | family with sequence similarity 120A                                                                                                         | 9q22.31        | 2.4 | 4.8 | 3.4 |
| 243761_at    | <i>PFTK1</i>                     | PFTAIRE protein kinase 1                                                                                                                     | ---            | 3.5 | 3.2 | 3.4 |
| 223179_at    | <i>YPEL3</i>                     | yippee-like 3 (Drosophila)                                                                                                                   | 16p11.2        | 2.5 | 4.4 | 3.3 |
| 219102_at    | <i>RCN3</i>                      | reticulocalbin 3, EF-hand calcium binding domain                                                                                             | 19q13.33       | 2.2 | 5.2 | 3.3 |
| 217211_at    | <i>LOC390861</i>                 | similar to cytoplasmic beta-actin                                                                                                            | ---            | 3.0 | 3.7 | 3.3 |
| 224140_at    | <i>NPCDR1</i>                    | nasopharyngeal carcinoma, down-regulated 1                                                                                                   | 3p21.1         | 2.6 | 4.2 | 3.3 |
| 1558253_x_at | <i>ZNF587</i>                    | zinc finger protein 587                                                                                                                      | 19q13.43       | 2.9 | 3.7 | 3.3 |
| 217492_s_at  | <i>LOC731292 / PTEN / PTENP1</i> | phosphatase and tensin homolog / phosphatase and tensin homolog , pseudogene 1 / sim. Phosphatidylinositol-3,4,5-trisphosphate 3-phosphatase | 10q23.3        | 3.1 | 3.5 | 3.3 |
| 1564344_at   | <i>ATP9B</i>                     | ATPase, class II, type 9B                                                                                                                    | 18q23          | 2.0 | 5.3 | 3.3 |
| 204053_x_at  | <i>PTEN</i>                      | phosphatase and tensin homolog                                                                                                               | 10q23.3        | 3.5 | 3.1 | 3.3 |
| 236884_at    | ---                              | Transcribed locus                                                                                                                            | ---            | 3.0 | 3.5 | 3.3 |
| 219779_at    | <i>ZFX4</i>                      | zinc finger homeobox 4                                                                                                                       | 8q21.11        | 3.4 | 3.1 | 3.3 |
| 226324_s_at  | <i>IFT172</i>                    | intraflagellar transport 172 homolog                                                                                                         | 2p23.3         | 2.2 | 4.7 | 3.2 |
| 210195_s_at  | <i>PSG1</i>                      | pregnancy specific beta-1-glycoprotein 1                                                                                                     | 9q13.2         | 3.1 | 3.3 | 3.2 |
| 1555565_s_at | <i>TAPBP</i>                     | TAP binding protein (tapasin)                                                                                                                | 6p21.3         | 2.0 | 5.0 | 3.2 |
| 214657_s_at  | <i>TncRNA</i>                    | Trophoblast-derived noncoding RNA                                                                                                            | 11q13.1        | 4.6 | 2.1 | 3.1 |
| 213448_at    | ---                              | CDNA FLJ31688 fis, clone NT2RI2005520                                                                                                        | 1q21           | 2.6 | 3.8 | 3.1 |
| 1563772_a_at | <i>LAMA3</i>                     | laminin, alpha 3                                                                                                                             | 18q11.2        | 2.4 | 4.1 | 3.1 |
| 230717_at    | <i>LCN12</i>                     | lipocalin 12                                                                                                                                 | 9q34.3         | 4.3 | 2.3 | 3.1 |
| 201401_s_at  | <i>ADRBK1</i>                    | adrenergic, beta, receptor kinase 1                                                                                                          | 11q13          | 3.4 | 2.9 | 3.1 |
| 210021_s_at  | <i>CCNO</i>                      | cyclin O                                                                                                                                     | 5p15.2-13.1    | 2.5 | 3.9 | 3.1 |
| 217484_at    | <i>CR1</i>                       | complement component (3b/4b) receptor 1                                                                                                      | 1q32           | 2.1 | 4.5 | 3.1 |
| 217009_at    | <i>PGK2</i>                      | phosphoglycerate kinase 2                                                                                                                    | 6p12.3         | 2.4 | 4.0 | 3.1 |
| 237218_at    | ---                              | ---                                                                                                                                          | 1p22.2         | 2.1 | 4.6 | 3.1 |
| 241516_at    | ---                              | ---                                                                                                                                          | 11p14.2        | 2.1 | 4.4 | 3.1 |
| 207004_at    | <i>BCL2</i>                      | B-cell CLL/lymphoma 2                                                                                                                        | 18q21.33 q21.3 | 2.4 | 4.0 | 3.1 |
| 1561726_s_at | ---                              | Homo sapiens, clone IMAGE:4940779, mRNA                                                                                                      | 11p15.5        | 2.1 | 4.4 | 3.0 |
| 1569905_at   | <i>HSD11B1L</i>                  | hydroxysteroid (11-beta) dehydrogenase 1-like                                                                                                | 19p13.3        | 2.5 | 3.7 | 3.0 |
| 228601_at    | <i>LOC401022</i>                 | hypothetical LOC401022                                                                                                                       | 2q31.2         | 2.5 | 3.6 | 3.0 |
| 202397_at    | <i>NUTF2</i>                     | nuclear transport factor 2                                                                                                                   | 16q22.1        | 2.4 | 3.7 | 3.0 |
| 229298_at    | ---                              | ---                                                                                                                                          | ---            | 2.4 | 3.7 | 3.0 |
| 209970_x_at  | <i>CASP1</i>                     | caspase 1, apoptosis-related cysteine peptidase                                                                                              | 11q23          | 3.4 | 2.6 | 3.0 |
| 43934_at     | <i>GPR137</i>                    | G protein-coupled receptor 137                                                                                                               | 11cen-q22.3    | 2.2 | 4.0 | 3.0 |
| 202767_at    | <i>ACP2</i>                      | acid phosphatase 2, lysosomal                                                                                                                | 11p12-p11      | 2.3 | 3.8 | 3.0 |
| 222622_at    | <i>LOC283871</i>                 | hypothetical protein LOC283871                                                                                                               | 16p13.3        | 2.7 | 3.3 | 3.0 |
| 237187_at    | ---                              | Transcribed locus, strongly similar to XP_509406.1                                                                                           | ---            | 2.1 | 4.2 | 3.0 |
| 239870_at    | <i>SPATS1</i>                    | spermatogenesis associated, serine-rich 1                                                                                                    | 6p21.1         | 3.3 | 2.7 | 2.9 |
| 239681_at    | <i>C17orf56</i>                  | chromosome 17 open reading frame 56                                                                                                          | 17q25.3        | 2.6 | 3.4 | 2.9 |
| 1570315_at   | <i>LOC283902</i>                 | hypothetical gene supported by BC019009                                                                                                      | 16q22.3        | 2.5 | 3.4 | 2.9 |
| 201534_s_at  | <i>UBL3</i>                      | ubiquitin-like 3                                                                                                                             | 13q12-q13      | 3.3 | 2.6 | 2.9 |
| 209782_s_at  | <i>DBP</i>                       | D site of albumin promoter (albumin D-box) binding protein                                                                                   | 19q13.3        | 2.2 | 3.9 | 2.9 |
| 205347_s_at  | <i>TMSL8</i>                     | thymosin-like 8                                                                                                                              | Xq21.33-22.3   | 3.3 | 2.6 | 2.9 |
| 1552734_at   | <i>RICTOR</i>                    | rapamycin-insensitive companion of mTOR                                                                                                      | 5p13.1         | 2.5 | 3.3 | 2.9 |
| 209093_s_at  | <i>GBA / GBAP</i>                | glucosidase, beta; acid / glucosidase, beta; acid, pseudogene                                                                                | 1q21           | 3.2 | 2.7 | 2.9 |
| 1561258_at   | ---                              | ---                                                                                                                                          | ---            | 2.7 | 3.1 | 2.9 |
| 206584_at    | <i>LY96</i>                      | lymphocyte antigen 96                                                                                                                        | 8q21.11        | 3.6 | 2.3 | 2.9 |
| 203387_s_at  | <i>TBC1D4</i>                    | TBC1 domain family, member 4                                                                                                                 | 13q22.2        | 2.0 | 4.1 | 2.9 |
| 208588_at    | <i>FKSG2</i>                     | apoptosis inhibitor                                                                                                                          | 8p11.2         | 2.2 | 3.7 | 2.9 |
| 235285_at    | ---                              | Transcribed locus                                                                                                                            | ---            | 2.2 | 3.6 | 2.8 |
| 219745_at    | <i>TMEM180</i>                   | transmembrane protein 180                                                                                                                    | 10q24.32       | 2.2 | 3.7 | 2.8 |
| 242738_s_at  | <i>ZFX3</i>                      | zinc finger homeobox 3                                                                                                                       | ---            | 2.1 | 3.8 | 2.8 |
| 243648_at    | ---                              | ---                                                                                                                                          | 22q12-q13      | 2.2 | 3.4 | 2.8 |
| 1559514_at   | ---                              | CDNA FLJ37869 fis, clone BRSSN2017422                                                                                                        | ---            | 2.2 | 3.4 | 2.8 |
| 201548_s_at  | <i>JARID1B</i>                   | jumonji, AT rich interactive domain 1B                                                                                                       | 1q32.1         | 2.6 | 2.9 | 2.7 |
| 217337_at    | <i>LOC646677 / LOC650674</i>     | similar to aconitase 2, mitochondrial                                                                                                        | 22q12.3        | 3.1 | 2.4 | 2.7 |
| 1570567_at   | ---                              | CDNA clone IMAGE:4753178                                                                                                                     | 5q13.2         | 2.8 | 2.7 | 2.7 |
| 202258_s_at  | <i>RP11-298P3.3</i>              | phosphonoformate immuno-associated protein 5                                                                                                 | 13q12-13       | 2.7 | 2.8 | 2.7 |
| 214449_s_at  | <i>RHOQ</i>                      | ras homolog gene family, member Q                                                                                                            | 2p21           | 2.3 | 3.2 | 2.7 |
| 243615_at    | ---                              | Transcribed locus                                                                                                                            | ---            | 2.3 | 3.3 | 2.7 |

|              |           |                                                            |                  |     |     |     |
|--------------|-----------|------------------------------------------------------------|------------------|-----|-----|-----|
| 1556284_at   | PPA2      | Pyrophosphatase (inorganic) 2                              | 4q25             | 3.3 | 2.3 | 2.7 |
| 231756_at    | ZP4       | zona pellucida glycoprotein 4                              | 1q43             | 2.2 | 3.3 | 2.7 |
| 201060_x_at  | STOM      | stomatin                                                   | 9q34.1           | 2.4 | 3.1 | 2.7 |
| 243606_at    | ---       | Transcribed locus                                          | ---              | 2.2 | 3.3 | 2.7 |
| 208089_s_at  | TDRD3     | tudor domain containing 3                                  | 13q21.2          | 3.6 | 2.0 | 2.7 |
| 228204_at    | PSMB4     | Proteasome (prosome, macropain) subunit, beta type, 4      | 1q21             | 2.2 | 3.3 | 2.7 |
| 34726_at     | CACNB3    | calcium channel, voltage-dependent, beta 3 subunit         | 12q13            | 2.5 | 2.8 | 2.7 |
| 213430_at    | RUFY3     | RUN and FYVE domain containing 3                           | 4q13.3           | 2.3 | 3.1 | 2.7 |
| 213844_at    | HOXA5     | homeobox A5                                                | 7p15-p14         | 2.0 | 3.5 | 2.7 |
| 635_s_at     | PPP2R5B   | protein phosphatase 2, regulatory subunit B', beta isoform | 11q12-13         | 2.1 | 3.3 | 2.7 |
| 243007_at    | ---       | CDNA FLJ43181 fis, clone FCBBF3016134                      | 10q11.22         | 2.7 | 2.5 | 2.6 |
| 202019_s_at  | LANCL1    | LanC lantibiotic synthetase component C-like 1 (bacterial) | 2q33-35          | 3.0 | 2.3 | 2.6 |
| 222772_at    | MYEF2     | myelin expression factor 2                                 | 15q21.1          | 2.2 | 3.1 | 2.6 |
| 208485_x_at  | CFLAR     | CASP8 and FADD-like apoptosis regulator                    | 2q33-34          | 2.2 | 3.0 | 2.6 |
| 202283_at    | SERPINF1  | serpin peptidase inhibitor, clade F , member 1             | 17p13.1          | 3.4 | 2.0 | 2.6 |
| 222806_s_at  | C11orf30  | chromosome 11 open reading frame 30                        | 11q13.5          | 2.3 | 2.9 | 2.6 |
| 225816_at    | PHF17     | PHD finger protein 17                                      | ---              | 2.1 | 3.2 | 2.6 |
| 1566549_at   | ---       | MRNA; cDNA DKFZp564C1382 (from DKFZp564C1382)              | Xp22.33          | 2.4 | 2.8 | 2.6 |
| 230481_at    | ACY3      | aspartoacylase (aminocyclase) 3                            | 11q13.2          | 2.8 | 2.4 | 2.6 |
| 1563521_at   | MOBK12B   | MOB1, Mps One Binder kinase activator-like 2B (yeast)      | 9p21.2           | 2.8 | 2.3 | 2.5 |
| 224694_at    | ANTXR1    | anthrax toxin receptor 1                                   | 2p13.1           | 2.4 | 2.6 | 2.5 |
| 223703_at    | C10orf11  | chromosome 10 open reading frame 11                        | 10q22.2-22.3     | 2.8 | 2.3 | 2.5 |
| 1565860_at   | ---       | Full length insert cDNA clone YP87H12                      | 2p15             | 2.0 | 3.2 | 2.5 |
| 223930_at    | ---       | ---                                                        | ---              | 2.4 | 2.7 | 2.5 |
| 201123_s_at  | EIF5A     | eukaryotic translation initiation factor 5A                | 17p13-12         | 2.0 | 3.1 | 2.5 |
| 204517_at    | PPIC      | peptidylprolyl isomerase C (cyclophilin C)                 | 5q23.2           | 2.6 | 2.5 | 2.5 |
| 229908_s_at  | UNKL      | unkempt homolog (Drosophila)-like                          | ---              | 2.3 | 2.7 | 2.5 |
| 219952_s_at  | MCOLN1    | mucopolipin 1                                              | 19p13.3-13.2     | 2.3 | 2.7 | 2.5 |
| 211862_x_at  | CFLAR     | CASP8 and FADD-like apoptosis regulator                    | 2q33-34          | 2.0 | 3.1 | 2.5 |
| 213300_at    | ATG2A     | ATG2 autophagy related 2 homolog A (S. cerevisiae)         | 11q13.1          | 2.2 | 2.8 | 2.5 |
| 235275_at    | BMP8B     | Bone morphogenetic protein 8b (osteogenic protein 2)       | 1p34             | 2.2 | 2.9 | 2.5 |
| 1554205_s_at | ICA1L     | islet cell autoantigen 1,69kDa-like                        | 2q33.1           | 2.3 | 2.7 | 2.5 |
| 204137_at    | GPR137B   | G protein-coupled receptor 137B                            | 1q42-43          | 2.5 | 2.4 | 2.4 |
| 224229_s_at  | AKT3      | v-akt murine thymoma viral oncogene homolog 3              | 1q43-44          | 2.3 | 2.6 | 2.4 |
| 1553157_at   | LHX4      | LIM homeobox 4                                             | 1q25.2           | 2.5 | 2.3 | 2.4 |
| 221875_x_at  | HLA-F     | major histocompatibility complex, class I, F               | 6p21.3           | 2.3 | 2.5 | 2.4 |
| 212117_at    | RHOQ      | ras homolog gene family, member Q                          | 2p21             | 2.3 | 2.5 | 2.4 |
| 212120_at    | RHOQ      | ras homolog gene family, member Q                          | 2q21.1           | 2.3 | 2.5 | 2.4 |
| 214073_at    | CTTN      | cortactin                                                  | 11q13            | 2.7 | 2.1 | 2.4 |
| 1555467_a_at | CUGBP1    | CUG triplet repeat, RNA binding protein 1                  | 11p11            | 2.3 | 2.5 | 2.4 |
| 1554310_a_at | EIF4G3    | eukaryotic translation initiation factor 4 gamma, 3        | 1p36.12          | 2.1 | 2.7 | 2.4 |
| 204262_s_at  | PSEN2     | presenilin 2 (Alzheimer disease 4)                         | 1q31-42          | 2.5 | 2.3 | 2.4 |
| 219828_at    | C9orf86   | chromosome 9 open reading frame 86                         | 9q34.3           | 2.0 | 2.8 | 2.4 |
| 235799_at    | NSL1      | NSL1, MIND kinetochore complex component, homolog          | 1q41             | 2.4 | 2.2 | 2.3 |
| 202825_at    | SLC25A4   | solute carrier family 25, member 4                         | 15q15.1          | 2.4 | 2.3 | 2.3 |
| 201151_s_at  | MBNL1     | muscleblind-like (Drosophila)                              | 3q25             | 2.3 | 2.4 | 2.3 |
| 1554047_at   | TXNDC9    | thioredoxin domain containing 9                            | 2q11.2           | 2.3 | 2.3 | 2.3 |
| 232676_x_at  | MYEF2     | myelin expression factor 2                                 | 15q21.1          | 2.1 | 2.6 | 2.3 |
| 91703_at     | EHBP1L1   | EH domain binding protein 1-like 1                         | 17q25.3 /11q13.1 | 2.0 | 2.6 | 2.3 |
| 231725_at    | PCDHB2    | protocadherin beta 2                                       | 5q31             | 2.1 | 2.5 | 2.3 |
| 1554019_s_at | C6orf182  | chromosome 6 open reading frame 182                        | 6q21             | 2.4 | 2.2 | 2.3 |
| 204806_x_at  | HLA-F     | major histocompatibility complex, class I, F               | 6p21.3           | 2.2 | 2.4 | 2.3 |
| 213249_at    | FBXL7     | F-box and leucine-rich repeat protein 7                    | 5p15.1           | 2.6 | 2.0 | 2.3 |
| 222575_at    | SETD5     | SET domain containing 5                                    | 3p25.3           | 2.1 | 2.4 | 2.3 |
| 220760_x_at  | ZNF665    | zinc finger protein 665                                    | 19q13.41         | 2.3 | 2.3 | 2.3 |
| 220240_s_at  | TMCO3     | transmembrane and coiled-coil domains 3                    | 13q34            | 2.4 | 2.1 | 2.3 |
| 208917_x_at  | NADK      | NAD kinase                                                 | 1p36.33-36.21    | 2.0 | 2.5 | 2.3 |
| 228003_at    | RAB30     | RAB30, member RAS oncogene family                          | 11q12-14         | 2.5 | 2.1 | 2.3 |
| 242172_at    | MEIS1     | Meis homeobox 1                                            | 2p14-p13         | 2.5 | 2.0 | 2.2 |
| 243515_at    | ---       | Homo sapiens, clone IMAGE:3641312, mRNA                    | 15q13.3          | 2.2 | 2.3 | 2.2 |
| 227099_s_at  | LOC387763 | hypothetical LOC387763                                     | 11p11.2          | 2.4 | 2.1 | 2.2 |
| 1554509_a_at | C10orf97  | chromosome 10 open reading frame 97                        | 10p13            | 2.4 | 2.1 | 2.2 |
| 204715_at    | PANX1     | pannexin 1                                                 | 11q21            | 2.4 | 2.0 | 2.2 |
| 216331_at    | ITGA7     | integrin, alpha 7                                          | 12q13            | 2.1 | 2.3 | 2.2 |
| 1552264_a_at | MAPK1     | mitogen-activated protein kinase 1                         | 22q11.2 q11.21   | 2.2 | 2.2 | 2.2 |
| 225798_at    | JAZF1     | JAZF zinc finger 1                                         | 7p15.2-15.1      | 2.1 | 2.3 | 2.2 |
| 229255_x_at  | ---       | Transcribed locus                                          | ---              | 2.1 | 2.3 | 2.2 |
| 1562337_at   | OR7D2     | olfactory receptor, family 7, subfamily D, member 2        | 19p13.2          | 2.1 | 2.3 | 2.2 |
| 202052_s_at  | RAI14     | retinoic acid induced 14                                   | 5p13.3-p13.2     | 2.1 | 2.2 | 2.2 |
| 211089_s_at  | NEK3      | NIMA (never in mitosis gene a)-related kinase 3            | 13q14.13         | 2.1 | 2.2 | 2.1 |
| 204392_at    | CAMK1     | calcium/calmodulin-dependent protein kinase I              | 3p25.3           | 2.1 | 2.2 | 2.1 |
| 239826_at    | ---       | Transcribed locus                                          | 18q11.2          | 2.0 | 2.2 | 2.1 |
| 201549_x_at  | JARID1B   | jumonji, AT rich interactive domain 1B                     | 1q32.1           | 2.0 | 2.2 | 2.1 |
| 219479_at    | KDEL1     | KDEL (Lys-Asp-Glu-Leu) containing 1                        | 13q33            | 2.0 | 2.2 | 2.1 |

|             |                   |                                                            |        |     |     |     |
|-------------|-------------------|------------------------------------------------------------|--------|-----|-----|-----|
| 222422_s_at | <i>NDFIP1</i>     | Nedd4 family interacting protein 1                         | 5q31.3 | 2.0 | 2.2 | 2.1 |
| 221551_x_at | <i>ST6GALNAC4</i> | ST6 -N-acetylgalactosaminide alpha-2,6-sialyltransferase 4 | 9q34   | 2.1 | 2.0 | 2.1 |
| 226368_at   | <i>CHST11</i>     | Carbohydrate (chondroitin 4) sulfotransferase 11           | 12q    | 2.1 | 2.0 | 2.1 |

**Down-regulated genes**

| Probe Set ID | Gene Symbol                  | Gene Title                                                      | Chromosome location | Fold change in PPP treated cells |            |       |
|--------------|------------------------------|-----------------------------------------------------------------|---------------------|----------------------------------|------------|-------|
|              |                              |                                                                 |                     | Line2-T500                       | Line3-T200 | Both  |
| 203180_at    | <i>ALDH1A3*</i>              | aldehyde dehydrogenase 1 family, member A3                      | 15q26.3             | -19.3                            | -66.7      | -35.9 |
| 201012_at    | <i>ANXA1*</i>                | annexin A1                                                      | 9q12-21.2           | -4.7                             | -94.3      | -21.0 |
| 212444_at    | ---                          | CDNA clone IMAGE:6025865                                        | ---                 | -5.4                             | -63.5      | -18.5 |
| 224341_x_at  | <i>TLR4*</i>                 | toll-like receptor 4                                            | 9q32-33             | -81.4                            | -3.5       | -17.0 |
| 1555882_at   | <i>SPIN3*</i>                | spindlin family, member 3                                       | Xp11.1              | -113.3                           | -2.3       | -16.1 |
| 240990_at    | <i>RAB5A*</i>                | RAB5A, member RAS oncogene family                               | 3p24-22             | -10.5                            | -24.5      | -16.1 |
| 227697_at    | <i>SOCS3*</i>                | suppressor of cytokine signaling 3                              | 17q25.3             | -9.1                             | -26.8      | -15.6 |
| 237750_at    | <i>XPNPEP3</i>               | X-prolyl aminopeptidase 3, putative                             | 22q13.31-13.33      | -3.5                             | -58.1      | -14.2 |
| 213953_at    | <i>KRT20</i>                 | keratin 20                                                      | 17q21.2             | -4.5                             | -33.2      | -12.2 |
| 1552378_s_at | <i>RDH10</i>                 | retinol dehydrogenase 10 (all-trans)                            | 8q21.11             | -11.9                            | -12.0      | -12.0 |
| 229876_at    | <i>PHKA1</i>                 | Phosphorylase kinase, alpha 1 (muscle)                          | Xq12-13             | -30.4                            | -4.6       | -11.9 |
| 237210_at    | <i>NFRKB</i>                 | nuclear factor related to kappaB binding protein                | 11q24-25            | -20.5                            | -5.6       | -10.7 |
| 235056_at    | <i>ETV6</i>                  | ets variant gene 6 (TEL oncogene)                               | 12p13               | -3.0                             | -37.9      | -10.7 |
| 206683_at    | <i>ZNF165</i>                | zinc finger protein 165                                         | 6p21.3              | -9.9                             | -11.1      | -10.5 |
| 238808_at    | ---                          | Transcribed locus                                               | ---                 | -7.0                             | -14.7      | -10.2 |
| 207992_s_at  | <i>AMPD3</i>                 | adenosine monophosphate deaminase (isoform E)                   | 11p15               | -13.1                            | -7.8       | -10.1 |
| 205199_at    | <i>CA9</i>                   | carbonic anhydrase IX                                           | 9p13-12             | -14.7                            | -5.8       | -9.2  |
| 215720_s_at  | <i>NFYA</i>                  | nuclear transcription factor Y, alpha                           | 6p21.3              | -5.8                             | -14.3      | -9.1  |
| 228083_at    | <i>CACNA2D4</i>              | calcium channel, voltage-dependent, alpha 2/delta subunit 4     | 12p13.33            | -5.2                             | -15.4      | -8.9  |
| 236835_at    | <i>LOC645431</i>             | hypothetical protein LOC645431                                  | 14q23.3             | -21.0                            | -3.1       | -8.0  |
| 1564676_a_at | ---                          | MRNA; cDNA DKFZp564D123                                         | 3q25.31             | -7.4                             | -8.3       | -7.8  |
| 208425_s_at  | <i>TANC2</i>                 | tetratricopeptide repeat, ankyrin repeat and coiled-coil cont 2 | 7q23.3              | -13.7                            | -4.4       | -7.8  |
| 209373_at    | <i>MALL</i>                  | mal, T-cell differentiation protein-like                        | 2q13                | -6.9                             | -8.3       | -7.6  |
| 215813_s_at  | <i>PTGS1</i>                 | prostaglandin-endoperoxide synthase 1 (prostaglandin G/H synt   | 9q32-33.3           | -4.5                             | -11.9      | -7.3  |
| 227974_at    | ---                          | Transcribed locus                                               | ---                 | -17.1                            | -3.1       | -7.3  |
| 210630_s_at  | <i>RAD52</i>                 | RAD52 homolog                                                   | 12p13-12.2          | -2.3                             | -21.1      | -7.0  |
| 237571_at    | ---                          | Transcribed locus                                               | 21q21.2 q21.3       | -3.3                             | -13.1      | -6.6  |
| 244239_at    | ---                          | Full length insert cDNA YN63H06                                 | chr5p15.1           | -18.0                            | -2.4       | -6.6  |
| 1556580_a_at | ---                          | CDNA FLJ30798 fis, clone FEBRA2001161                           | ---                 | -3.4                             | -12.5      | -6.5  |
| 1555673_at   | <i>LOC728285 / LOC728934</i> | similar to keratin associated protein 2-4                       | 17q12-21            | -4.4                             | -9.4       | -6.5  |
| 1556761_at   | ---                          | CDNA FLJ30197 fis, clone BRACE2001423                           | 8p23.1              | -5.6                             | -7.2       | -6.4  |
| 238484_s_at  | ---                          | MRNA; clone CD 43T7                                             | ---                 | -8.7                             | -4.7       | -6.4  |
| 1559062_at   | ---                          | Homo sapiens, clone IMAGE:5730164, mRNA                         | ---                 | -3.3                             | -12.2      | -6.3  |
| 242161_at    | ---                          | Transcribed locus                                               | 7p12-14             | -3.2                             | -12.4      | -6.3  |
| 203108_at    | <i>GPRC5A</i>                | G protein-coupled receptor, family C, group 5, member A         | 12p13-12.3          | -3.8                             | -10.1      | -6.2  |
| 220945_x_at  | <i>MANSC1</i>                | MANSC domain containing 1                                       | 12p13.2             | -4.1                             | -9.1       | -6.1  |
| 201324_at    | <i>EMP1</i>                  | epithelial membrane protein 1                                   | 12p12.3             | -2.2                             | -16.3      | -6.0  |
| 205110_s_at  | <i>FGF13</i>                 | fibroblast growth factor 13                                     | Xq26.3              | -3.4                             | -10.6      | -6.0  |
| 201325_s_at  | <i>EMP1</i>                  | epithelial membrane protein 1                                   | 12p12.3             | -2.3                             | -15.5      | -6.0  |
| 1559128_at   | <i>HSDL2</i>                 | hydroxysteroid dehydrogenase like 2                             | 9q32                | -2.4                             | -14.5      | -5.9  |
| 244009_at    | ---                          | Transcribed locus                                               | 5q23                | -3.6                             | -9.5       | -5.9  |
| 219263_at    | <i>RNF128</i>                | ring finger protein 128                                         | Xq22.3              | -8.1                             | -4.1       | -5.8  |
| 242409_at    | ---                          | Full-length cDNA clone CS0CAP003YO10 of Thymus                  | 14q24.3             | -12.4                            | -2.6       | -5.7  |
| 224480_s_at  | <i>MAG1</i>                  | lung cancer metastasis-associated protein                       | 4q21.23             | -4.7                             | -6.8       | -5.6  |
| 204698_at    | <i>ISG20</i>                 | interferon stimulated exonuclease gene 20kDa                    | 15q26               | -3.1                             | -10.3      | -5.6  |
| 1564950_at   | ---                          | CDNA clone IMAGE:4052341                                        | 8p21.2              | -2.2                             | -13.8      | -5.5  |
| 240510_at    | <i>NBN</i>                   | Nibrin                                                          | 8q21                | -5.8                             | -5.1       | -5.4  |
| 202499_s_at  | <i>SLC2A3</i>                | solute carrier family 2, member 3                               | 12p13.3             | -3.6                             | -8.1       | -5.4  |
| 1568777_at   | <i>EML5</i>                  | echinoderm microtubule associated protein like 5                | 14q31.3             | -8.2                             | -3.5       | -5.4  |
| 229011_at    | ---                          | Transcribed locus                                               | ---                 | -2.9                             | -9.6       | -5.3  |
| 230820_at    | ---                          | Transcribed locus                                               | ---                 | -4.2                             | -6.6       | -5.3  |
| 213428_s_at  | <i>COL6A1</i>                | collagen, type VI, alpha 1                                      | 21q22.3             | -5.7                             | -4.7       | -5.2  |
| 222941_at    | <i>FLJ11850</i>              | hypothetical protein FLJ11850                                   | 4q11                | -2.8                             | -8.9       | -5.0  |
| 218991_at    | <i>HEATR6</i>                | HEAT repeat containing 6                                        | 17q23.1             | -2.0                             | -12.3      | -5.0  |
| 238210_at    | ---                          | Transcribed locus                                               | 3q22                | -6.3                             | -3.9       | -5.0  |
| 214698_at    | <i>ROD1</i>                  | ROD1 regulator of differentiation 1 (S. pombe)                  | 9q32                | -3.8                             | -6.5       | -4.9  |
| 212097_at    | <i>CAV1</i>                  | caveolin 1, caveolae protein, 22kDa                             | 7q31.1              | -2.6                             | -9.2       | -4.9  |
| 242434_at    | ---                          | CDNA FLJ31093 fis, clone IMR321000161                           | ---                 | -3.2                             | -7.3       | -4.9  |
| 214579_at    | <i>NPAL3</i>                 | NIPA-like domain containing 3                                   | 1p36.12-35.1        | -10.3                            | -2.3       | -4.9  |
| 201295_s_at  | ---                          | ---                                                             | 17q11.1             | -5.0                             | -4.6       | -4.8  |
| 236180_at    | ---                          | Transcribed locus                                               | 12p13.3             | -6.1                             | -3.8       | -4.8  |
| 1559705_s_at | <i>PHKA2</i>                 | phosphorylase kinase, alpha 2 (liver)                           | Xp22.2-22.1         | -2.5                             | -9.0       | -4.8  |
| 208614_s_at  | <i>FLNB</i>                  | filamin B, beta (actin binding protein 278)                     | 3p14.3              | -4.6                             | -4.9       | -4.7  |
| 234049_at    | ---                          | Clone PP1195 unknown mRNA                                       | 8p23.1              | -2.0                             | -10.8      | -4.7  |
| 203030_s_at  | <i>PTPRN2</i>                | protein tyrosine phosphatase, receptor type, N pp 2             | 7q36                | -6.1                             | -3.5       | -4.6  |

|              |                  |                                                             |             |      |      |      |
|--------------|------------------|-------------------------------------------------------------|-------------|------|------|------|
| 1556814_a_at | ---              | Full length insert cDNA clone ZA96G04                       | ---         | -2.7 | -7.9 | -4.6 |
| 213895_at    | <i>EMP1</i>      | epithelial membrane protein 1                               | 12p12.3     | -3.1 | -6.7 | -4.5 |
| 202067_s_at  | <i>LDLR</i>      | low density lipoprotein receptor                            | 19p13.3     | -2.2 | -9.0 | -4.5 |
| 1561486_at   | ---              | MRNA; cDNA DKFZp666M193                                     | ---         | -2.7 | -7.2 | -4.5 |
| 224832_at    | <i>DUSP16</i>    | dual specificity phosphatase 16                             | 12p13       | -3.3 | -5.8 | -4.4 |
| 204363_at    | <i>F3</i>        | coagulation factor III (thromboplastin, tissue factor)      | 1p22-21     | -3.8 | -5.0 | -4.4 |
| 203821_at    | <i>HBEGF</i>     | heparin-binding EGF-like growth factor                      | 5q23        | -3.0 | -6.5 | -4.4 |
| 209765_at    | <i>ADAM19</i>    | ADAM metalloproteinase domain 19 (meltrin beta)             | 5q32-33     | -5.2 | -3.7 | -4.4 |
| 201645_at    | <i>TNC</i>       | tenascin C (hexabrachion)                                   | 9q33        | -6.0 | -3.1 | -4.3 |
| 216859_x_at  | ---              | ---                                                         | ---         | -5.8 | -3.2 | -4.3 |
| 220233_at    | <i>FBXO17</i>    | F-box protein 17                                            | 19q13.2     | -3.8 | -4.9 | -4.3 |
| 233730_at    | <i>FAM135A</i>   | family with sequence similarity 135, member A               | 6q12-13     | -4.8 | -3.8 | -4.3 |
| 222088_s_at  | <i>SLC2A3</i>    | solute carrier family 2, member 3                           | 12p13.3     | -3.9 | -4.6 | -4.3 |
| 220719_at    | <i>FLJ13769</i>  | hypothetical protein FLJ13769                               | 12q24.31    | -3.6 | -5.0 | -4.2 |
| 202498_s_at  | <i>SLC2A3</i>    | solute carrier family 2, member 3                           | 12p13.3     | -2.1 | -8.3 | -4.2 |
| 204530_s_at  | <i>TOX</i>       | thymocyte selection-associated high mobility group box      | 8q12.1      | -6.1 | -2.9 | -4.2 |
| 208791_at    | <i>CLU</i>       | clusterin                                                   | 8p21-12     | -4.7 | -3.7 | -4.2 |
| 218625_at    | <i>NRN1</i>      | neuritin 1                                                  | 6p25.1      | -5.0 | -3.5 | -4.2 |
| 38037_at     | <i>HBEGF</i>     | heparin-binding EGF-like growth factor                      | 5q23        | -5.5 | -3.2 | -4.2 |
| 230757_at    | <i>FLJ44796</i>  | hypothetical FLJ44796                                       | 5q31.1      | -3.1 | -5.6 | -4.1 |
| 239762_at    | <i>LOC286437</i> | hypothetical protein LOC286437                              | Xq22.2      | -5.1 | -3.3 | -4.1 |
| 235086_at    | <i>THBS1</i>     | Thrombospondin 1                                            | 15q15       | -3.8 | -4.3 | -4.0 |
| 209917_s_at  | <i>TP53AP1</i>   | TP53 activated protein 1                                    | 7q21.1      | -2.1 | -7.6 | -4.0 |
| 1560019_at   | <i>MGC11082</i>  | Hypothetical protein MGC11082                               | 18p11.3     | -2.9 | -5.5 | -4.0 |
| 238439_at    | <i>ANKRD22</i>   | ankyrin repeat domain 22                                    | 10q23.31    | -6.1 | -2.6 | -4.0 |
| 1559528_at   | <i>PCGF3</i>     | Polycomb group ring finger 3                                | ---         | -4.0 | -3.9 | -4.0 |
| 227732_at    | <i>ATXN7L1</i>   | ataxin 7-like 1                                             | 7q22.1      | -2.1 | -7.4 | -3.9 |
| 238813_at    | ---              | Transcribed locus                                           | ---         | -4.7 | -3.3 | -3.9 |
| 244470_at    | <i>RNF12</i>     | Ring finger protein 12                                      | Xq13-21     | -3.5 | -4.4 | -3.9 |
| 1554279_a_at | <i>CXorf34</i>   | chromosome X open reading frame 34                          | Xq22.1      | -7.5 | -2.0 | -3.9 |
| 234028_at    | ---              | Clone L49 HERV-K-T47-like long terminal repeat sequence     | 3q27.2      | -3.2 | -4.7 | -3.9 |
| 243290_at    | <i>WWC1</i>      | WW and C2 domain containing 1                               | 3p14.1      | -2.5 | -6.0 | -3.9 |
| 1557065_at   | <i>YLP1</i>      | YLP motif containing 1                                      | 14q24.3     | -2.1 | -6.9 | -3.8 |
| 212473_s_at  | <i>MICAL2</i>    | microtubule associated monooxygenase                        | 11p15.3     | -6.7 | -2.2 | -3.8 |
| 203065_s_at  | <i>CAV1</i>      | caveolin 1, caveolae protein, 22kDa                         | 7q31.1      | -2.5 | -5.7 | -3.8 |
| 201951_at    | <i>ALCAM</i>     | activated leukocyte cell adhesion molecule                  | 3q13.1      | -5.0 | -2.9 | -3.8 |
| 39248_at     | <i>AQP3</i>      | aquaporin 3                                                 | 9p13        | -2.7 | -5.2 | -3.8 |
| 205596_s_at  | <i>SMURF2</i>    | SMAD specific E3 ubiquitin protein ligase 2                 | 17q22-23    | -3.4 | -4.1 | -3.8 |
| 1561167_at   | ---              | Full length insert cDNA clone YA75A09                       | 12p13       | -4.3 | -3.3 | -3.8 |
| 232020_at    | <i>SMURF2</i>    | SMAD specific E3 ubiquitin protein ligase 2                 | 17q22-23    | -4.0 | -3.5 | -3.7 |
| 230127_at    | ---              | Transcribed locus                                           | ---         | -5.1 | -2.6 | -3.7 |
| 202105_at    | <i>IGBP1</i>     | immunoglobulin (CD79A) binding protein 1                    | Xq13.1-13.3 | -3.9 | -3.4 | -3.7 |
| 237968_at    | <i>ARL6IP2</i>   | ADP-ribosylation factor-like 6 interacting protein 2        | 2p22.2-22.1 | -3.3 | -4.0 | -3.6 |
| 202254_at    | <i>SIPA1L1</i>   | Signal-induced proliferation-associated 1 like 1            | 14q24.2     | -2.1 | -6.2 | -3.6 |
| 215163_at    | ---              | ---                                                         | ---         | -2.7 | -4.8 | -3.6 |
| 1559722_at   | ---              | CDNA clone IMAGE:4830182                                    | 9q22.32     | -3.4 | -3.9 | -3.6 |
| 235494_at    | ---              | CDNA clone IMAGE:5284125                                    | ---         | -3.2 | -4.1 | -3.6 |
| 234072_at    | <i>SEMA4A</i>    | semaphorin 4A                                               | 1q22        | -2.6 | -5.0 | -3.6 |
| 210319_x_at  | <i>MSX2</i>      | msh homeobox 2                                              | 5q34-35     | -2.4 | -5.2 | -3.6 |
| 1556655_s_at | ---              | CDNA FLJ38740 fis, clone KIDNE2011782                       | ---         | -3.0 | -4.2 | -3.6 |
| 232113_at    | ---              | CDNA FLJ38472 fis, clone FEBRA2022148                       | 11q24.1     | -5.4 | -2.3 | -3.6 |
| 241272_at    | ---              | Transcribed locus                                           | 9q33        | -3.5 | -3.6 | -3.6 |
| 219563_at    | <i>C14orf139</i> | chromosome 14 open reading frame 139                        | 14q32.13    | -2.2 | -5.6 | -3.5 |
| 209679_s_at  | <i>LOC57228</i>  | small trans-membrane and glycosylated protein               | 12q13.13    | -5.2 | -2.3 | -3.5 |
| 224964_s_at  | <i>GNG2</i>      | guanine nucleotide binding protein (G protein), gamma 2     | 14q21       | -2.4 | -4.9 | -3.5 |
| 1552727_s_at | <i>ADAMTS17</i>  | ADAM metalloproteinase with thrombospondin type 1 motif, 17 | 15q24       | -5.4 | -2.2 | -3.4 |
| 211106_at    | ---              | ---                                                         | 6p21.1-21.3 | -3.5 | -3.2 | -3.4 |
| 205016_at    | <i>TGFA</i>      | transforming growth factor, alpha                           | 2p13        | -3.7 | -3.0 | -3.4 |
| 1565627_a_at | ---              | Full length insert cDNA clone ZD55G10                       | 15q26.3     | -3.1 | -3.6 | -3.3 |
| 1556722_a_at | <i>FLJ33706</i>  | hypothetical protein FLJ33706                               | 20q11.21    | -2.2 | -4.9 | -3.3 |
| 206385_s_at  | <i>ANK3</i>      | ankyrin 3, node of Ranvier (ankyrin G)                      | 10q21       | -5.1 | -2.2 | -3.3 |
| 220663_at    | <i>IL1RAPL1</i>  | interleukin 1 receptor accessory protein-like 1             | Xp22.1-21.3 | -3.3 | -3.2 | -3.3 |
| 208613_s_at  | <i>FLNB</i>      | filamin B, beta                                             | 3p14.3      | -2.1 | -5.0 | -3.3 |
| 217466_x_at  | <i>RPS2</i>      | ribosomal protein S2                                        | ---         | -3.5 | -3.0 | -3.3 |
| 226485_at    | ---              | CDNA FLJ37658 fis, clone BRHIP2010593                       | ---         | -2.7 | -3.8 | -3.2 |
| 226021_at    | <i>RDH10</i>     | retinol dehydrogenase 10                                    | 8q21.11     | -3.0 | -3.4 | -3.2 |
| 57540_at     | <i>RBKS</i>      | ribokinase                                                  | 2p23.3      | -3.8 | -2.7 | -3.2 |
| 236716_at    | ---              | CDNA clone IMAGE:5303125                                    | ---         | -3.8 | -2.6 | -3.2 |
| 225842_at    | <i>PHLDA1</i>    | pleckstrin homology-like domain, family A, member 1         | 12q15       | -3.3 | -3.1 | -3.2 |
| 206076_at    | <i>LRRC23</i>    | leucine rich repeat containing 23                           | 12p13       | -3.1 | -3.2 | -3.1 |
| 217999_s_at  | <i>PHLDA1</i>    | pleckstrin homology-like domain, family A, member 1         | 12q15       | -3.1 | -3.2 | -3.1 |
| 1570439_at   | ---              | Clone FLB9835 PRO2660                                       | 6q26        | -2.6 | -3.7 | -3.1 |
| 232779_at    | ---              | CDNA FLJ20781 fis, clone COL04235                           | 6p25        | -3.0 | -3.2 | -3.1 |
| 232413_at    | ---              | CDNA FLJ13497 fis, clone PLACE1004518                       | 10q11       | -3.6 | -2.7 | -3.1 |

|              |                             |                                                                            |                |      |      |      |
|--------------|-----------------------------|----------------------------------------------------------------------------|----------------|------|------|------|
| 204984_at    | <i>GPC4</i>                 | glypican 4                                                                 | Xq26.1         | -4.4 | -2.2 | -3.1 |
| 228005_at    | <i>ZXDB</i>                 | zinc finger, X-linked, duplicated B                                        | Xp11.21        | -2.7 | -3.5 | -3.1 |
| 227467_at    | <i>RDH10</i>                | retinol dehydrogenase 10 (all-trans)                                       | 8q21.11        | -3.0 | -3.2 | -3.1 |
| 232919_at    | <i>AFG3L2</i>               | AFG3 ATPase family gene 3-like 2 (yeast)                                   | 18p11          | -2.4 | -3.9 | -3.1 |
| 218450_at    | <i>HEBP1</i>                | heme binding protein 1                                                     | 12p13.1        | -2.1 | -4.4 | -3.1 |
| 213093_at    | <i>PRKCA</i>                | protein kinase C, alpha                                                    | 17q22-23.2     | -3.4 | -2.8 | -3.0 |
| 242926_at    | ---                         | Transcribed locus                                                          | 2q33.3         | -2.0 | -4.5 | -3.0 |
| 201860_s_at  | <i>PLAT</i>                 | plasminogen activator, tissue                                              | 8p12           | -3.0 | -2.9 | -3.0 |
| 202718_at    | <i>IGFBP2</i>               | insulin-like growth factor binding protein 2, 36kDa                        | 2q33-34        | -3.4 | -2.6 | -3.0 |
| 232502_at    | <i>FLJ34077 / LOC728558</i> | weakly similar to zinc finger protein 195 / hypothetical protein LOC728558 | 10q23-24       | -2.1 | -4.1 | -3.0 |
| 208792_s_at  | <i>CLU</i>                  | clusterin                                                                  | 8p21-12        | -3.6 | -2.4 | -3.0 |
| 225171_at    | <i>ARHGAP18</i>             | Rho GTPase activating protein 18                                           | 6q22.33        | -2.1 | -4.2 | -3.0 |
| 232998_at    | ---                         | CDNA FLJ14173 fis, clone NT2RP2002755                                      | 4q31.3         | -4.2 | -2.1 | -3.0 |
| 209098_s_at  | <i>JAG1</i>                 | jagged 1 (Alagille syndrome)                                               | 20p12.1-11.23  | -3.0 | -2.9 | -3.0 |
| 200637_s_at  | <i>PTPRF</i>                | protein tyrosine phosphatase, receptor type, F                             | 1p34           | -3.5 | -2.5 | -2.9 |
| 219222_at    | <i>RBKS</i>                 | ribokinase                                                                 | 2p23.3         | -2.6 | -3.3 | -2.9 |
| 202609_at    | <i>EPS8</i>                 | epidermal growth factor receptor pathway substrate 8                       | 12q13          | -2.1 | -4.0 | -2.9 |
| 227372_s_at  | <i>BAIAP2L1</i>             | BAI1-associated protein 2-like 1                                           | 7q21.3         | -2.0 | -4.2 | -2.9 |
| 1560609_at   | <i>CRYZL1</i>               | crystallin, zeta (quinone reductase)-like 1                                | 21q21.3        | -4.1 | -2.0 | -2.9 |
| 236915_at    | <i>LOC441054</i>            | hypothetical protein LOC441054                                             | ---            | -3.2 | -2.7 | -2.9 |
| 244356_at    | ---                         | Transcribed locus                                                          | 7q11.23        | -2.3 | -3.6 | -2.9 |
| 233707_at    | ---                         | CDNA FLJ14174 fis, clone NT2RP2002843                                      | 3p14.2         | -2.4 | -3.4 | -2.9 |
| 1568983_a_at | ---                         | CDNA clone IMAGE:5261717                                                   | ---            | -3.7 | -2.2 | -2.9 |
| 205419_at    | <i>EBI2</i>                 | Epstein-Barr virus induced gene 2                                          | 13q32.3        | -2.2 | -3.8 | -2.9 |
| 211998_at    | <i>H3F3B</i>                | H3 histone, family 3B (H3.3B)                                              | 17q25          | -2.5 | -3.3 | -2.9 |
| 1559142_at   | <i>MYST3</i>                | MYST histone acetyltransferase 3                                           | 8p11           | -2.9 | -2.8 | -2.9 |
| 243310_at    | ---                         | Transcribed locus                                                          | 20p13          | -3.7 | -2.2 | -2.9 |
| 227205_at    | <i>TAF1</i>                 | TAF1 RNA polymerase II                                                     | Xq13.1         | -2.5 | -3.3 | -2.8 |
| 1553901_x_at | <i>ZNF486</i>               | zinc finger protein 486                                                    | 19p12          | -2.8 | -2.8 | -2.8 |
| 240042_at    | <i>FIBCD1</i>               | fibrinogen C domain containing 1                                           | 9q34.12-34.13  | -2.4 | -3.3 | -2.8 |
| 223553_s_at  | <i>DOK3</i>                 | docking protein 3                                                          | 5q35.3         | -3.9 | -2.0 | -2.8 |
| 212552_at    | <i>HPCAL1</i>               | hippocalcin-like 1                                                         | 2p25.1         | -2.1 | -3.7 | -2.8 |
| 241360_at    | <i>CCDC15</i>               | coiled-coil domain containing 15                                           | 11q24.2        | -2.3 | -3.3 | -2.8 |
| 204286_s_at  | <i>PMAIP1</i>               | phorbol-12-myristate-13-acetate-induced protein 1                          | 18q21.32       | -2.5 | -3.1 | -2.8 |
| 202085_at    | <i>TJP2</i>                 | tight junction protein 2                                                   | 9q13-q21       | -2.0 | -3.8 | -2.8 |
| 201373_at    | <i>PLEC1</i>                | plectin 1, intermediate filament binding protein 500kDa                    | 8q24           | -2.9 | -2.7 | -2.8 |
| 235819_at    | ---                         | Transcribed locus                                                          | ---            | -2.1 | -3.7 | -2.8 |
| 1558017_s_at | ---                         | CDNA FLJ14942 fis, A-PLACE1011185                                          | 12q21          | -3.6 | -2.1 | -2.7 |
| 1555681_at   | ---                         | MUSP1 (MUSP1)                                                              | ---            | -2.9 | -2.6 | -2.7 |
| 222450_at    | <i>TMEPAI</i>               | transmembrane, prostate androgen induced RNA                               | 20q13.31-13.33 | -3.7 | -2.0 | -2.7 |
| 1568623_a_at | <i>SLC35E4</i>              | solute carrier family 35, member E4                                        | 22q12.2        | -2.7 | -2.8 | -2.7 |
| 239760_at    | ---                         | CDNA FLJ30257 fis, clone BRACE2002467                                      | 17q22          | -2.4 | -3.1 | -2.7 |
| 238462_at    | <i>UBASH3B</i>              | ubiquitin associated and SH3 domain containing, B                          | 11q24.1        | -2.5 | -2.9 | -2.7 |
| 229864_at    | <i>TMEM103</i>              | Transmembrane protein 103                                                  | 3p21.31        | -3.0 | -2.4 | -2.7 |
| 232406_at    | ---                         | CDNA FLJ13731 fis, clone PLACE3000142                                      | 20p12.1-11.23  | -3.1 | -2.3 | -2.7 |
| 238909_at    | <i>S100A10</i>              | S100 calcium binding protein A10                                           | 1q21           | -2.4 | -2.9 | -2.7 |
| 232362_at    | <i>CCDC18</i>               | coiled-coil domain containing 18                                           | 1p22.1         | -2.4 | -3.0 | -2.7 |
| 1556608_a_at | <i>EHD4</i>                 | EH-domain containing 4                                                     | 15q11.1        | -3.1 | -2.3 | -2.7 |
| 236118_at    | <i>LOC728473</i>            | hypothetical protein LOC728473                                             | ---            | -2.3 | -3.1 | -2.7 |
| 212838_at    | <i>DNMBP</i>                | dynamamin binding protein                                                  | 10q24.2        | -3.2 | -2.2 | -2.6 |
| 230206_at    | <i>DOCK5</i>                | Dedicator of cytokinesis 5                                                 | 8p21.2         | -2.8 | -2.5 | -2.6 |
| 238669_at    | <i>PTGS1</i>                | prostaglandin-endoperoxide synthase 1                                      | 9q32-33.3      | -3.0 | -2.3 | -2.6 |
| 1554122_a_at | <i>HSD17B12</i>             | hydroxysteroid (17-beta) dehydrogenase 12                                  | 11p11.2        | -2.0 | -3.4 | -2.6 |
| 206583_at    | <i>ZNF673</i>               | zinc finger protein 673                                                    | Xp11.3         | -2.3 | -3.0 | -2.6 |
| 210128_s_at  | <i>LTBR</i>                 | leukotriene B4 receptor                                                    | 14q11.2-12     | -3.1 | -2.2 | -2.6 |
| 225029_at    | <i>LOC550643</i>            | hypothetical protein LOC550643                                             | Xp11.1         | -3.1 | -2.2 | -2.6 |
| 222421_at    | <i>UBE2H</i>                | ubiquitin-conjugating enzyme E2H                                           | 7q32           | -2.3 | -3.0 | -2.6 |
| 209672_s_at  | <i>FLJ20323</i>             | hypothetical protein FLJ20323                                              | 7p22-p21       | -2.6 | -2.6 | -2.6 |
| 201189_s_at  | <i>ITPR3</i>                | inositol 1,4,5-triphosphate receptor, type 3                               | 6p21           | -2.4 | -2.8 | -2.6 |
| 225728_at    | <i>SORBS2</i>               | sorbin and SH3 domain containing 2                                         | 4q35.1         | -2.6 | -2.6 | -2.6 |
| 235406_x_at  | ---                         | CDNA clone IMAGE:4814828                                                   | ---            | -3.2 | -2.1 | -2.6 |
| 202912_at    | <i>ADM</i>                  | adrenomedullin                                                             | 11p15.4        | -2.5 | -2.7 | -2.6 |
| 244046_at    | <i>URG4</i>                 | up-regulated gene 4                                                        | 7p13           | -2.2 | -3.1 | -2.6 |
| 220149_at    | <i>C2orf54</i>              | chromosome 2 open reading frame 54                                         | 2q37.3         | -2.3 | -2.9 | -2.6 |
| 225361_x_at  | <i>FAM122B</i>              | family with sequence similarity 122B                                       | Xq26.3         | -2.4 | -2.8 | -2.6 |
| 224797_at    | <i>ARRDC3</i>               | arrestin domain containing 3                                               | 5q14.3         | -2.7 | -2.5 | -2.6 |
| 238587_at    | <i>UBASH3B</i>              | ubiquitin associated and SH3 domain containing, B                          | 11q24.1        | -2.5 | -2.6 | -2.6 |
| 218000_s_at  | <i>PHLDA1</i>               | pleckstrin homology-like domain, family A, member 1                        | 12q15          | -2.5 | -2.6 | -2.6 |
| 1558447_at   | ---                         | CDNA FLJ35687 fis, clone SPLEN2019349                                      | 19p13.3        | -2.9 | -2.3 | -2.6 |
| 221480_at    | <i>HNRPD</i>                | heterogeneous nuclear ribonucleoprotein D                                  | 4q21.1-21.2    | -2.7 | -2.5 | -2.6 |
| 242273_at    | ---                         | Transcribed locus                                                          | ---            | -2.1 | -3.1 | -2.6 |
| 215195_at    | <i>PRKCA</i>                | protein kinase C, alpha                                                    | 17q22-23.2     | -2.4 | -2.7 | -2.5 |
| 222673_x_at  | <i>FAM122B /</i>            | transmembrane protein 57 /                                                 | 1p36.11        | -2.7 | -2.3 | -2.5 |



|              |                       |                                                                   |                                   |      |      |      |
|--------------|-----------------------|-------------------------------------------------------------------|-----------------------------------|------|------|------|
|              | <i>TMEM57</i>         | family with sequence similarity 122B                              | Xq26.3                            |      |      |      |
| 1565849_a_at | <i>ZNF576</i>         | Zinc finger protein 576                                           | 19q13.31                          | -2.4 | -2.7 | -2.5 |
| 209008_x_at  | <i>KRT8</i>           | keratin 8                                                         | 12q13                             | -2.7 | -2.4 | -2.5 |
| 205462_s_at  | <i>HPCAL1</i>         | hippocalcin-like 1                                                | 2p25.1                            | -2.9 | -2.2 | -2.5 |
| 1553708_at   | <i>MGC16075</i>       | hypothetical protein MGC16075                                     | chr7p12.3                         | -2.3 | -2.7 | -2.5 |
| 211445_x_at  | <i>NACAP1</i>         | nascent-polypeptide-associated complex $\alpha$ pp pseudogene 1   | 8q22.3 / 4q32.3                   | -3.0 | -2.1 | -2.5 |
| 201906_s_at  | <i>CTDSPL</i>         | CTD small phosphatase-like                                        | 3p21.3                            | -2.1 | -2.9 | -2.5 |
| 219580_s_at  | <i>TMC5</i>           | transmembrane channel-like 5                                      | 16p12.3                           | -2.7 | -2.2 | -2.5 |
| 204268_at    | <i>S100A2</i>         | S100 calcium binding protein A2                                   | 1q21                              | -2.8 | -2.1 | -2.5 |
| 220590_at    | <i>ITFG2</i>          | integrin alpha FG-GAP repeat containing 2                         | 12p13.33                          | -2.9 | -2.1 | -2.5 |
| 1552362_a_at | <i>LEAP2</i>          | liver expressed antimicrobial peptide 2                           | 5q31.1                            | -2.5 | -2.4 | -2.4 |
| 216268_s_at  | <i>JAG1</i>           | jagged 1                                                          | 20p12.1-11.23                     | -2.3 | -2.5 | -2.4 |
| 202071_at    | <i>SDC4</i>           | syndecan 4                                                        | 20q12                             | -2.1 | -2.9 | -2.4 |
| 220172_at    | <i>C2orf37</i>        | chromosome 2 open reading frame 37                                | 2q31.1                            | -2.3 | -2.5 | -2.4 |
| 233543_s_at  | <i>CCDC98</i>         | coiled-coil domain containing 98                                  | 4q21.21-21.23                     | -2.1 | -2.7 | -2.4 |
| 231183_s_at  | <i>JAG1</i>           | Jagged 1                                                          | 20p12.1-11.23                     | -2.7 | -2.1 | -2.4 |
| 205547_s_at  | <i>TAGLN</i>          | transgelin                                                        | 11q23.2                           | -2.4 | -2.4 | -2.4 |
| 239944_at    | <i>NAIP</i>           | NLR family, apoptosis inhibitory protein                          | 5q13                              | -2.8 | -2.1 | -2.4 |
| 236114_at    | ---                   | Transcribed locus                                                 | 21q22.3                           | -2.3 | -2.5 | -2.4 |
| 220890_s_at  | <i>DDX47</i>          | DEAD box polypeptide 47                                           | 12p13.1                           | -2.8 | -2.1 | -2.4 |
| 240315_at    | ---                   | Transcribed locus                                                 | 6q24.1                            | -2.3 | -2.5 | -2.4 |
| 201312_s_at  | <i>SH3BGR1</i>        | SH3 domain binding glutamic acid-rich protein like                | Xq13.3                            | -2.5 | -2.3 | -2.4 |
| 238542_at    | <i>ULBP2</i>          | UL16 binding protein 2                                            | 6q25                              | -2.1 | -2.7 | -2.4 |
| 229559_at    | <i>FLJ40125</i>       | hypothetical protein FLJ40125                                     | 19q13.32                          | -2.6 | -2.1 | -2.4 |
| 1563461_at   | ---                   | MRNA; cDNA DKFZp686P153                                           | 15q25.1                           | -2.1 | -2.7 | -2.4 |
| 203282_at    | <i>GBE1</i>           | glucan (1,4-alpha-), branching enzyme 1                           | 3p12.3                            | -2.0 | -2.7 | -2.4 |
| 236526_x_at  | <i>FLJ13611</i>       | hypothetical protein FLJ13611                                     | 5q12.3                            | -2.2 | -2.6 | -2.4 |
| 232612_s_at  | <i>ATG16L1</i>        | ATG16 autophagy related 16-like 1                                 | 2q37.1                            | -2.2 | -2.4 | -2.3 |
| 233778_at    | ---                   | Uncharacterized gastric protein ZG16P                             | 10q24.32                          | -2.1 | -2.6 | -2.3 |
| 1560199_x_at | <i>FLJ11903</i>       | similar to hypothetical protein MGC40405                          | 5q12.1                            | -2.1 | -2.6 | -2.3 |
| 203790_s_at  | <i>HRSP12</i>         | heat-responsive protein 12                                        | 8q22                              | -2.1 | -2.5 | -2.3 |
| 202468_s_at  | <i>CTNNA1</i>         | catenin (cadherin-associated protein), alpha-like 1               | 9q31.2                            | -2.4 | -2.2 | -2.3 |
| 230207_s_at  | <i>DOCK5</i>          | Dedicator of cytokinesis 5                                        | 8p21.2                            | -2.6 | -2.0 | -2.3 |
| 239866_at    | ---                   | CDNA FLJ14392 fis, clone HEMBA1003166                             | ---                               | -2.6 | -2.1 | -2.3 |
| 239207_at    | <i>JARID1C</i>        | jumonji, AT rich interactive domain 1C                            | Xp11.22-11.21                     | -2.2 | -2.3 | -2.3 |
| 201188_s_at  | <i>ITPR3</i>          | inositol 1,4,5-triphosphate receptor, type 3                      | 6p21                              | -2.1 | -2.4 | -2.3 |
| 215066_at    | <i>PTPRF</i>          | protein tyrosine phosphatase, receptor type, F                    | 1p34                              | -2.4 | -2.2 | -2.3 |
| 233506_at    | ---                   | Full length insert cDNA clone ZB81B12                             | ---                               | -2.2 | -2.3 | -2.3 |
| 239897_at    | <i>BCLAF1</i>         | BCL2-associated transcription factor 1                            | 6q22-q23                          | -2.2 | -2.3 | -2.3 |
| 210653_s_at  | <i>BCKDHB</i>         | branched chain keto acid dehydrogenase E1, beta pp                | 6q13-q15                          | -2.6 | -2.0 | -2.3 |
| 33304_at     | <i>ISG20</i>          | interferon stimulated exonuclease gene 20kDa                      | 15q26                             | -2.2 | -2.3 | -2.2 |
| 200737_at    | <i>PGK1</i>           | phosphoglycerate kinase 1                                         | Xq13                              | -2.4 | -2.1 | -2.2 |
| 232002_at    | ---                   | MRNA; cDNA DKFZp547I084 (                                         | 19q13.1                           | -2.0 | -2.4 | -2.2 |
| 231899_at    | <i>ZC3H12C</i>        | zinc finger CCCH-type containing 12C                              | 11q22.3                           | -2.1 | -2.3 | -2.2 |
| 222714_s_at  | <i>LACTB2</i>         | lactamase, beta 2                                                 | 8p22-q22.3                        | -2.4 | -2.0 | -2.2 |
| 240800_x_at  | ---                   | Transcribed locus                                                 | 7q11.21-11.22                     | -2.3 | -2.1 | -2.2 |
| 209566_at    | <i>INSIG2</i>         | insulin induced gene 2                                            | 2q14.1                            | -2.1 | -2.3 | -2.2 |
| 243159_x_at  | ---                   | Transcribed locus                                                 | 1q32                              | -2.3 | -2.1 | -2.2 |
| 209386_at    | <i>TM4SF1</i>         | transmembrane 4 L six family member 1                             | 3q21-25                           | -2.3 | -2.1 | -2.2 |
| 231886_at    | <i>DKFZP-434B2016</i> | similar to hypothetical protein LOC284701                         | 7p22.3 / 11p15.5 / 1p36.33 / 3q29 | -2.2 | -2.1 | -2.2 |
| 203431_s_at  | <i>RICS</i>           | Rho GTPase-activating protein                                     | 11q24-25                          | -2.0 | -2.3 | -2.2 |
| 202959_at    | <i>MUT</i>            | methylmalonyl Coenzyme A mutase                                   | 6p21                              | -2.2 | -2.1 | -2.1 |
| 236571_at    | ---                   | Transcribed locus                                                 | 12p13.3                           | -2.0 | -2.2 | -2.1 |
| 216862_s_at  | <i>MTCP1</i>          | mature T-cell proliferation 1                                     | Xq28                              | -2.2 | -2.1 | -2.1 |
| 202733_at    | <i>P4HA2</i>          | procollagen-proline, 2-oxoglutarate 4-dioxygenase, $\alpha$ pp II | 5q31                              | -2.2 | -2.1 | -2.1 |
| 200796_s_at  | <i>MCL1</i>           | myeloid cell leukemia sequence 1 (BCL2-related)                   | 1q21                              | -2.2 | -2.1 | -2.1 |
| 1556110_at   | ---                   | CDNA FLJ39819 fis, clone SPLEN2010534                             | ---                               | -2.2 | -2.0 | -2.1 |
| 201955_at    | <i>CCNC</i>           | cyclin C                                                          | 6q21                              | -2.1 | -2.1 | -2.1 |
| 219833_s_at  | <i>EFHC1</i>          | EF-hand domain (C-terminal) containing 1                          | 6p12.3                            | -2.0 | -2.2 | -2.1 |
| 202331_at    | <i>BCKDHA</i>         | branched chain keto acid dehydrogenase E1, alpha pp               | 9q13.1-13.2                       | -2.1 | -2.0 | -2.1 |
| 224833_at    | <i>ETS1</i>           | v-ets erythroblastosis virus E26 oncogene homolog 1               | 11q23.3                           | -2.1 | -2.1 | -2.1 |
| 209122_at    | <i>ADFP</i>           | adipose differentiation-related protein                           | 9p22.1                            | -2.0 | -2.1 | -2.1 |
| 227290_at    | ---                   | CDNA FLJ13598 fis, clone PLACE1009921                             | ---                               | -2.0 | -2.0 | -2.0 |

\* indicates genes validated by siRNA
