# Supplementary material for: Molecular Characterization of Acquired Tolerance of Tumor Cells to Picropodophyllin (PPP)
Source: PubMed Central journal article supplement (PMC3056661; doi:10.1371/journal.pone.0014757), 2011-03-14
Supplement: pone.0014757.s008.pdf [file pone.0014757.s008.pdf]

**Table S6.** Ontological categories generated from common up-regulated and down-regulated genes in PPP tolerant Line2-T500 and Line3-T200 cells (by DAVID, from gene list U).

| ID                          | Name of GO category                                                                     | No. of genes | p-value |
|-----------------------------|-----------------------------------------------------------------------------------------|--------------|---------|
| <b>UP-REGULATED GENES</b>   |                                                                                         |              |         |
| <b>Biological processes</b> |                                                                                         |              |         |
| GO:0008219                  | cell death                                                                              | 18           | 0.016   |
| <b>Cellular components</b>  |                                                                                         |              |         |
| GO:0044424                  | intracellular part                                                                      | 134          | 0.005   |
| GO:0005622                  | intracellular                                                                           | 138          | 0.020   |
| GO:0005737                  | cytoplasm                                                                               | 88           | 0.021   |
| GO:0043229                  | intracellular organelle                                                                 | 110          | 0.048   |
| GO:0044431                  | Golgi apparatus part                                                                    | 11           | 0.011   |
| GO:0000139                  | Golgi membrane                                                                          | 9            | 0.038   |
| <b>KEGG pathway</b>         |                                                                                         |              |         |
| hsa04510:                   | focal adhesion                                                                          | 8            | 0.028   |
| <b>SMART</b>                |                                                                                         |              |         |
| SM00165                     | UBA                                                                                     | 4            | 0.006   |
| <b>SP COMMENT</b>           |                                                                                         |              |         |
| similarity:                 | contains 1 UBA domain.                                                                  | 4            | 0.003   |
| cofactor                    | magnesium                                                                               | 7            | 0.039   |
| <b>INTERPRO</b>             |                                                                                         |              |         |
| IPR000449                   | Ubiquitin-associated/translation elongation factor EF1B, N-terminal                     | 4            | 0.013   |
| IPR015880                   | Zinc finger, C2H2-like                                                                  | 10           | 0.032   |
| IPR011992                   | EF-Hand type                                                                            | 8            | 0.018   |
| <b>SP PIR KEYWORDS</b>      |                                                                                         |              |         |
| Keyword                     | apoptosis                                                                               | 9            | 0.020   |
| <b>UP SEQ FEATURE</b>       |                                                                                         |              |         |
| domain                      | UBA                                                                                     | 4            | 0.004   |
| <b>DOWN-REGULATED GENES</b> |                                                                                         |              |         |
| <b>Biological processes</b> |                                                                                         |              |         |
| GO:0008219                  | cell death                                                                              | 19           | 0.002   |
| GO:0048522                  | positive regulation of cellular process                                                 | 21           | 0.002   |
| GO:0030154                  | cell differentiation                                                                    | 32           | 0.002   |
| GO:0043067                  | regulation of programmed cell death                                                     | 14           | 0.003   |
| GO:0048518                  | positive regulation of metabolic process                                                | 22           | 0.004   |
| GO:0045595                  | regulation of cell differentiation                                                      | 6            | 0.023   |
| GO:0051094                  | positive regulation of developmental process                                            | 4            | 0.036   |
| GO:0009611                  | response to wounding                                                                    | 11           | 0.010   |
| <b>Molecular functions</b>  |                                                                                         |              |         |
| GO:0051213                  | dioxygenase activity                                                                    | 4            | 0.020   |
| GO:0016701                  | oxidoreductase activity, acting on single donors with incorporation of molecular oxygen | 4            | 0.021   |
| <b>Cellular components</b>  |                                                                                         |              |         |
| GO:0005622                  | intracellular                                                                           | 119          | 0.042   |
| <b>KEGG Pathway</b>         |                                                                                         |              |         |
| hsa00280                    | valine, leucine and isoleucine degradation                                              | 4            | 0.025   |
| <b>INTERPRO</b>             |                                                                                         |              |         |
| IPR000742                   | EGF-like, type 3                                                                        | 9            | 0.001   |

|                        |                                                                      |    |       |
|------------------------|----------------------------------------------------------------------|----|-------|
| IPR006210              | EGF                                                                  | 8  | 0.007 |
| IPR013032              | EGF-like region                                                      | 9  | 0.015 |
| IPR001452              | Src homology-3                                                       | 8  | 0.007 |
| IPR001715              | Calponin-like actin-binding                                          | 4  | 0.031 |
| <b>SP PIR KEYWORDS</b> |                                                                      |    |       |
| Key word               | egf-like domain                                                      | 9  | 0.002 |
| Key word               | apoptosis                                                            | 9  | 0.009 |
| Key word               | SH3 domain                                                           | 7  | 0.017 |
| Key word               | tyrosine-specific phosphatase                                        | 3  | 0.036 |
| Key word               | metalloprotease                                                      | 5  | 0.049 |
| Key word               | DNA binding                                                          | 8  | 0.036 |
| <b>UP SEQ FEATURE</b>  |                                                                      |    |       |
| domain                 | EGF-like                                                             | 5  | 0.006 |
| domain                 | EGF-like 3                                                           | 4  | 0.023 |
| active site            | Phosphocysteine intermediate                                         | 4  | 0.044 |
| metal ion-binding site | Zinc (catalytic)                                                     | 5  | 0.031 |
| <b>SP COMMENT</b>      |                                                                      |    |       |
| similarity             | Contains 1 EGF-like domain                                           | 5  | 0.007 |
| similarity             | Contains 1 SH3 domain                                                | 6  | 0.042 |
| catalytic activity     | Protein tyrosine phosphate + H(2)O =<br>protein tyrosine + phosphate | 4  | 0.050 |
| subcellular location   | Membrane; Single-pass type I membrane protein                        | 11 | 0.017 |
| <b>SMART</b>           |                                                                      |    |       |
| SM00181                | EGF                                                                  | 8  | 0.009 |
| SM00326                | SH3                                                                  | 8  | 0.009 |
| SM00033                | CH                                                                   | 4  | 0.036 |

---
