# Supplementary material for: Molecular Characterization of Acquired Tolerance of Tumor Cells to Picropodophyllin (PPP)
Source: PubMed Central journal article supplement (PMC3056661; doi:10.1371/journal.pone.0014757), 2011-03-14
Supplement: pone.0014757.s009.pdf [file pone.0014757.s009.pdf]

**Table S7.** Ontological categories generated from common up- and down-regulated genes in PPP tolerant Line2-T500 and Line3-T200 cells (by DAVID, from gene list H).

| ID                          | Name of category                               | No. of genes | p-value |
|-----------------------------|------------------------------------------------|--------------|---------|
| <b>UP-REGULATED GENES</b>   |                                                |              |         |
| <b>Biological processes</b> |                                                |              |         |
| GO:0002009                  | morphogenesis of an epithelium                 | 3            | 0.020   |
| <b>Molecular functions</b>  |                                                |              |         |
| GO:0003677                  | DNA binding                                    | 12           | 0.040   |
| <b>INTERPRO</b>             |                                                |              |         |
| IPR001965                   | Zinc finger, PHD-type                          | 3            | 0.027   |
| <b>SMART</b>                |                                                |              |         |
| SM00249                     | PHD                                            | 3            | 0.045   |
| <b>DOWN-REGULATED GENES</b> |                                                |              |         |
| <b>Biological processes</b> |                                                |              |         |
| GO:0030154                  | cell differentiation                           | 18           | 0.004   |
| GO:0008219                  | cell death                                     | 11           | 0.005   |
| GO:0006928                  | cell motility                                  | 7            | 0.014   |
| GO:0016477                  | cell migration                                 | 5            | 0.038   |
| GO:0003013                  | circulatory system process                     | 4            | 0.044   |
| GO:0048523                  | negative regulation of cellular process        | 11           | 0.038   |
| GO:0048519                  | negative regulation of biological process      | 11           | 0.049   |
| <b>Molecular functions</b>  |                                                |              |         |
| GO:0004842                  | ubiquitin-protein ligase activity              | 4            | 0.019   |
| GO:0016879                  | ligase activity, forming carbon-nitrogen bonds | 4            | 0.048   |
| <b>Cellular components</b>  |                                                |              |         |
| GO:0044433                  | cytoplasmic vesicle part                       | 4            | 0.012   |
| GO:0012506                  | vesicle membrane                               | 4            | 0.017   |
| GO:0044459                  | plasma membrane part                           | 17           | 0.010   |
| GO:0005886                  | plasma membrane                                | 23           | 0.023   |
| GO:0044425                  | membrane part                                  | 36           | 0.026   |
| <b>INTERPRO</b>             |                                                |              |         |
| IPR001452                   | Src homology-3                                 | 7            | <0.001  |
| <b>SMART</b>                |                                                |              |         |
| SM00326                     | SH3                                            | 7            | <0.001  |
| <b>SP PIR KEYWORDS</b>      |                                                |              |         |
| Key word                    | SH3 domain                                     | 6            | 0.002   |
| Key word                    | EF hand                                        | 3            | 0.024   |
| Key word                    | membrane                                       | 35           | 0.006   |
| Key word                    | cytoskeleton                                   | 6            | 0.019   |
